# Supplementary material
Source: ML conference proceedings conference paper supplement (https://proceedings.neurips.cc/paper_files/paper/2022/hash/41b6674c28a9b93ec8d22a53ca25bc3b-Abstract.html)
Supplement: Supplementary file 1 [file 41b6674c28a9b93ec8d22a53ca25bc3b-Supplemental-Conference.zip]

Archive with 347 entries (307 files):
- a_new_family_of_generalization_bounds_supp/
- a_new_family_of_generalization_bounds_supp/.DS_Store
- __MACOSX/a_new_family_of_generalization_bounds_supp/._.DS_Store
- a_new_family_of_generalization_bounds_supp/a_new_family_of_generalization_bounds_appendix.pdf
- __MACOSX/a_new_family_of_generalization_bounds_supp/._a_new_family_of_generalization_bounds_appendix.pdf
- a_new_family_of_generalization_bounds_supp/klbound/
- __MACOSX/a_new_family_of_generalization_bounds_supp/._klbound
- a_new_family_of_generalization_bounds_supp/klbound/.DS_Store
- __MACOSX/a_new_family_of_generalization_bounds_supp/klbound/._.DS_Store
- a_new_family_of_generalization_bounds_supp/klbound/new_family_evaluated_cmi_test.ipynb
- __MACOSX/a_new_family_of_generalization_bounds_supp/klbound/._new_family_evaluated_cmi_test.ipynb
- a_new_family_of_generalization_bounds_supp/klbound/README.md
- __MACOSX/a_new_family_of_generalization_bounds_supp/klbound/._README.md
- a_new_family_of_generalization_bounds_supp/klbound/f-CMI/
- __MACOSX/a_new_family_of_generalization_bounds_supp/klbound/._f-CMI
- a_new_family_of_generalization_bounds_supp/klbound/f-CMI/methods/
- __MACOSX/a_new_family_of_generalization_bounds_supp/klbound/f-CMI/._methods
- a_new_family_of_generalization_bounds_supp/klbound/f-CMI/.DS_Store
- __MACOSX/a_new_family_of_generalization_bounds_supp/klbound/f-CMI/._.DS_Store
- a_new_family_of_generalization_bounds_supp/klbound/f-CMI/LICENSE
- __MACOSX/a_new_family_of_generalization_bounds_supp/klbound/f-CMI/._LICENSE
- a_new_family_of_generalization_bounds_supp/klbound/f-CMI/figs/
- __MACOSX/a_new_family_of_generalization_bounds_supp/klbound/f-CMI/._figs
- a_new_family_of_generalization_bounds_supp/klbound/f-CMI/README-harutyunyan-etal.md
- __MACOSX/a_new_family_of_generalization_bounds_supp/klbound/f-CMI/._README-harutyunyan-etal.md
- a_new_family_of_generalization_bounds_supp/klbound/f-CMI/results/
- __MACOSX/a_new_family_of_generalization_bounds_supp/klbound/f-CMI/._results
- a_new_family_of_generalization_bounds_supp/klbound/f-CMI/nnlib/
- __MACOSX/a_new_family_of_generalization_bounds_supp/klbound/f-CMI/._nnlib
- a_new_family_of_generalization_bounds_supp/klbound/f-CMI/configs/
- __MACOSX/a_new_family_of_generalization_bounds_supp/klbound/f-CMI/._configs
- a_new_family_of_generalization_bounds_supp/klbound/f-CMI/scripts/
- __MACOSX/a_new_family_of_generalization_bounds_supp/klbound/f-CMI/._scripts
- a_new_family_of_generalization_bounds_supp/klbound/f-CMI/fcmi_scripts.py
- __MACOSX/a_new_family_of_generalization_bounds_supp/klbound/f-CMI/._fcmi_scripts.py
- a_new_family_of_generalization_bounds_supp/klbound/f-CMI/modules/
- __MACOSX/a_new_family_of_generalization_bounds_supp/klbound/f-CMI/._modules
- a_new_family_of_generalization_bounds_supp/klbound/f-CMI/fcmi_parse_results.py
- __MACOSX/a_new_family_of_generalization_bounds_supp/klbound/f-CMI/._fcmi_parse_results.py
- a_new_family_of_generalization_bounds_supp/klbound/f-CMI/methods/__init__.py
- __MACOSX/a_new_family_of_generalization_bounds_supp/klbound/f-CMI/methods/.___init__.py
- a_new_family_of_generalization_bounds_supp/klbound/f-CMI/methods/__pycache__/
- __MACOSX/a_new_family_of_generalization_bounds_supp/klbound/f-CMI/methods/.___pycache__
- a_new_family_of_generalization_bounds_supp/klbound/f-CMI/methods/classifiers.py
- __MACOSX/a_new_family_of_generalization_bounds_supp/klbound/f-CMI/methods/._classifiers.py
- a_new_family_of_generalization_bounds_supp/klbound/f-CMI/methods/base.py
- __MACOSX/a_new_family_of_generalization_bounds_supp/klbound/f-CMI/methods/._base.py
- a_new_family_of_generalization_bounds_supp/klbound/f-CMI/nnlib/LICENSE
- __MACOSX/a_new_family_of_generalization_bounds_supp/klbound/f-CMI/nnlib/._LICENSE
- a_new_family_of_generalization_bounds_supp/klbound/f-CMI/nnlib/__init__.py
- __MACOSX/a_new_family_of_generalization_bounds_supp/klbound/f-CMI/nnlib/.___init__.py
- a_new_family_of_generalization_bounds_supp/klbound/f-CMI/nnlib/__pycache__/
- __MACOSX/a_new_family_of_generalization_bounds_supp/klbound/f-CMI/nnlib/.___pycache__
- a_new_family_of_generalization_bounds_supp/klbound/f-CMI/nnlib/README.md
- __MACOSX/a_new_family_of_generalization_bounds_supp/klbound/f-CMI/nnlib/._README.md
- a_new_family_of_generalization_bounds_supp/klbound/f-CMI/nnlib/nnlib/
- __MACOSX/a_new_family_of_generalization_bounds_supp/klbound/f-CMI/nnlib/._nnlib
- a_new_family_of_generalization_bounds_supp/klbound/f-CMI/nnlib/.gitignore
- __MACOSX/a_new_family_of_generalization_bounds_supp/klbound/f-CMI/nnlib/._.gitignore
- a_new_family_of_generalization_bounds_supp/klbound/f-CMI/nnlib/.git/
- __MACOSX/a_new_family_of_generalization_bounds_supp/klbound/f-CMI/nnlib/._.git
- a_new_family_of_generalization_bounds_supp/klbound/f-CMI/configs/pretrained-resnet50-cifar10.json
- __MACOSX/a_new_family_of_generalization_bounds_supp/klbound/f-CMI/configs/._pretrained-resnet50-cifar10.json
- a_new_family_of_generalization_bounds_supp/klbound/f-CMI/configs/4layer-mlp-mnist.json
- __MACOSX/a_new_family_of_generalization_bounds_supp/klbound/f-CMI/configs/._4layer-mlp-mnist.json
- a_new_family_of_generalization_bounds_supp/klbound/f-CMI/configs/binary-mnist-4layer-lowdeep-CNN.json
- __MACOSX/a_new_family_of_generalization_bounds_supp/klbound/f-CMI/configs/._binary-mnist-4layer-lowdeep-CNN.json
- a_new_family_of_generalization_bounds_supp/klbound/f-CMI/configs/resnet_cifar10-meta.json
- __MACOSX/a_new_family_of_generalization_bounds_supp/klbound/f-CMI/configs/._resnet_cifar10-meta.json
- a_new_family_of_generalization_bounds_supp/klbound/f-CMI/configs/resnet_cifar10.json
- __MACOSX/a_new_family_of_generalization_bounds_supp/klbound/f-CMI/configs/._resnet_cifar10.json
- a_new_family_of_generalization_bounds_supp/klbound/f-CMI/configs/binary-mnist-4layer-deep-CNN.json
- __MACOSX/a_new_family_of_generalization_bounds_supp/klbound/f-CMI/configs/._binary-mnist-4layer-deep-CNN.json
- a_new_family_of_generalization_bounds_supp/klbound/f-CMI/configs/4layer-cnn-cifar10.json
- __MACOSX/a_new_family_of_generalization_bounds_supp/klbound/f-CMI/configs/._4layer-cnn-cifar10.json
- a_new_family_of_generalization_bounds_supp/klbound/f-CMI/configs/1hidden-mlp-mnist-meta.json
- __MACOSX/a_new_family_of_generalization_bounds_supp/klbound/f-CMI/configs/._1hidden-mlp-mnist-meta.json
- a_new_family_of_generalization_bounds_supp/klbound/f-CMI/configs/binary-mnist-4layer-midwide-CNN.json
- __MACOSX/a_new_family_of_generalization_bounds_supp/klbound/f-CMI/configs/._binary-mnist-4layer-midwide-CNN.json
- a_new_family_of_generalization_bounds_supp/klbound/f-CMI/configs/1hidden-mlp-mnist.json
- __MACOSX/a_new_family_of_generalization_bounds_supp/klbound/f-CMI/configs/._1hidden-mlp-mnist.json
- a_new_family_of_generalization_bounds_supp/klbound/f-CMI/configs/binary-mnist-4layer-wide-CNN.json
- __MACOSX/a_new_family_of_generalization_bounds_supp/klbound/f-CMI/configs/._binary-mnist-4layer-wide-CNN.json
- a_new_family_of_generalization_bounds_supp/klbound/f-CMI/configs/4layer-cnn-cifar10-meta.json
- __MACOSX/a_new_family_of_generalization_bounds_supp/klbound/f-CMI/configs/._4layer-cnn-cifar10-meta.json
- a_new_family_of_generalization_bounds_supp/klbound/f-CMI/configs/.ipynb_checkpoints/
- __MACOSX/a_new_family_of_generalization_bounds_supp/klbound/f-CMI/configs/._.ipynb_checkpoints
- a_new_family_of_generalization_bounds_supp/klbound/f-CMI/configs/4layer-big-mlp-mnist.json
- __MACOSX/a_new_family_of_generalization_bounds_supp/klbound/f-CMI/configs/._4layer-big-mlp-mnist.json
- a_new_family_of_generalization_bounds_supp/klbound/f-CMI/configs/binary-mnist-4layer-CNN.json
- __MACOSX/a_new_family_of_generalization_bounds_supp/klbound/f-CMI/configs/._binary-mnist-4layer-CNN.json
- a_new_family_of_generalization_bounds_supp/klbound/f-CMI/scripts/__init__.py
- __MACOSX/a_new_family_of_generalization_bounds_supp/klbound/f-CMI/scripts/.___init__.py
- a_new_family_of_generalization_bounds_supp/klbound/f-CMI/scripts/__pycache__/
- __MACOSX/a_new_family_of_generalization_bounds_supp/klbound/f-CMI/scripts/.___pycache__
- a_new_family_of_generalization_bounds_supp/klbound/f-CMI/scripts/train_classifier.py
- __MACOSX/a_new_family_of_generalization_bounds_supp/klbound/f-CMI/scripts/._train_classifier.py
- a_new_family_of_generalization_bounds_supp/klbound/f-CMI/scripts/fcmi_train_classifier.py
- __MACOSX/a_new_family_of_generalization_bounds_supp/klbound/f-CMI/scripts/._fcmi_train_classifier.py
- a_new_family_of_generalization_bounds_supp/klbound/f-CMI/modules/bound_utils.py
- __MACOSX/a_new_family_of_generalization_bounds_supp/klbound/f-CMI/modules/._bound_utils.py
- a_new_family_of_generalization_bounds_supp/klbound/f-CMI/modules/__init__.py
- __MACOSX/a_new_family_of_generalization_bounds_supp/klbound/f-CMI/modules/.___init__.py
- a_new_family_of_generalization_bounds_supp/klbound/f-CMI/modules/__pycache__/
- __MACOSX/a_new_family_of_generalization_bounds_supp/klbound/f-CMI/modules/.___pycache__
- a_new_family_of_generalization_bounds_supp/klbound/f-CMI/modules/data_utils.py
- __MACOSX/a_new_family_of_generalization_bounds_supp/klbound/f-CMI/modules/._data_utils.py
- a_new_family_of_generalization_bounds_supp/klbound/f-CMI/modules/nn_utils.py
- __MACOSX/a_new_family_of_generalization_bounds_supp/klbound/f-CMI/modules/._nn_utils.py
- a_new_family_of_generalization_bounds_supp/klbound/f-CMI/methods/__pycache__/classifiers.cpython-37.pyc
- __MACOSX/a_new_family_of_generalization_bounds_supp/klbound/f-CMI/methods/__pycache__/._classifiers.cpython-37.pyc
- a_new_family_of_generalization_bounds_supp/klbound/f-CMI/methods/__pycache__/base.cpython-37.pyc
- __MACOSX/a_new_family_of_generalization_bounds_supp/klbound/f-CMI/methods/__pycache__/._base.cpython-37.pyc
- a_new_family_of_generalization_bounds_supp/klbound/f-CMI/methods/__pycache__/__init__.cpython-37.pyc
- __MACOSX/a_new_family_of_generalization_bounds_supp/klbound/f-CMI/methods/__pycache__/.___init__.cpython-37.pyc
- a_new_family_of_generalization_bounds_supp/klbound/f-CMI/nnlib/__pycache__/__init__.cpython-37.pyc
- __MACOSX/a_new_family_of_generalization_bounds_supp/klbound/f-CMI/nnlib/__pycache__/.___init__.cpython-37.pyc
- a_new_family_of_generalization_bounds_supp/klbound/f-CMI/nnlib/nnlib/metrics.py
- __MACOSX/a_new_family_of_generalization_bounds_supp/klbound/f-CMI/nnlib/nnlib/._metrics.py
- a_new_family_of_generalization_bounds_supp/klbound/f-CMI/nnlib/nnlib/gradients.py
- __MACOSX/a_new_family_of_generalization_bounds_supp/klbound/f-CMI/nnlib/nnlib/._gradients.py
- a_new_family_of_generalization_bounds_supp/klbound/f-CMI/nnlib/nnlib/data_utils/
- __MACOSX/a_new_family_of_generalization_bounds_supp/klbound/f-CMI/nnlib/nnlib/._data_utils
- a_new_family_of_generalization_bounds_supp/klbound/f-CMI/nnlib/nnlib/__init__.py
- __MACOSX/a_new_family_of_generalization_bounds_supp/klbound/f-CMI/nnlib/nnlib/.___init__.py
- a_new_family_of_generalization_bounds_supp/klbound/f-CMI/nnlib/nnlib/__pycache__/
- __MACOSX/a_new_family_of_generalization_bounds_supp/klbound/f-CMI/nnlib/nnlib/.___pycache__
- a_new_family_of_generalization_bounds_supp/klbound/f-CMI/nnlib/nnlib/visualizations.py
- __MACOSX/a_new_family_of_generalization_bounds_supp/klbound/f-CMI/nnlib/nnlib/._visualizations.py
- a_new_family_of_generalization_bounds_supp/klbound/f-CMI/nnlib/nnlib/networks/
- __MACOSX/a_new_family_of_generalization_bounds_supp/klbound/f-CMI/nnlib/nnlib/._networks
- a_new_family_of_generalization_bounds_supp/klbound/f-CMI/nnlib/nnlib/utils.py
- __MACOSX/a_new_family_of_generalization_bounds_supp/klbound/f-CMI/nnlib/nnlib/._utils.py
- a_new_family_of_generalization_bounds_supp/klbound/f-CMI/nnlib/nnlib/matplotlib_utils.py
- __MACOSX/a_new_family_of_generalization_bounds_supp/klbound/f-CMI/nnlib/nnlib/._matplotlib_utils.py
- a_new_family_of_generalization_bounds_supp/klbound/f-CMI/nnlib/nnlib/callbacks.py
- __MACOSX/a_new_family_of_generalization_bounds_supp/klbound/f-CMI/nnlib/nnlib/._callbacks.py
- a_new_family_of_generalization_bounds_supp/klbound/f-CMI/nnlib/nnlib/method_utils.py
- __MACOSX/a_new_family_of_generalization_bounds_supp/klbound/f-CMI/nnlib/nnlib/._method_utils.py
- a_new_family_of_generalization_bounds_supp/klbound/f-CMI/nnlib/nnlib/tensorboard_utils.py
- __MACOSX/a_new_family_of_generalization_bounds_supp/klbound/f-CMI/nnlib/nnlib/._tensorboard_utils.py
- a_new_family_of_generalization_bounds_supp/klbound/f-CMI/nnlib/nnlib/losses.py
- __MACOSX/a_new_family_of_generalization_bounds_supp/klbound/f-CMI/nnlib/nnlib/._losses.py
- a_new_family_of_generalization_bounds_supp/klbound/f-CMI/nnlib/nnlib/nn_utils.py
- __MACOSX/a_new_family_of_generalization_bounds_supp/klbound/f-CMI/nnlib/nnlib/._nn_utils.py
- a_new_family_of_generalization_bounds_supp/klbound/f-CMI/nnlib/nnlib/training.py
- __MACOSX/a_new_family_of_generalization_bounds_supp/klbound/f-CMI/nnlib/nnlib/._training.py
- a_new_family_of_generalization_bounds_supp/klbound/f-CMI/nnlib/.git/config
- __MACOSX/a_new_family_of_generalization_bounds_supp/klbound/f-CMI/nnlib/.git/._config
- a_new_family_of_generalization_bounds_supp/klbound/f-CMI/nnlib/.git/objects/
- __MACOSX/a_new_family_of_generalization_bounds_supp/klbound/f-CMI/nnlib/.git/._objects
- a_new_family_of_generalization_bounds_supp/klbound/f-CMI/nnlib/.git/HEAD
- __MACOSX/a_new_family_of_generalization_bounds_supp/klbound/f-CMI/nnlib/.git/._HEAD
- a_new_family_of_generalization_bounds_supp/klbound/f-CMI/nnlib/.git/info/
- __MACOSX/a_new_family_of_generalization_bounds_supp/klbound/f-CMI/nnlib/.git/._info
- a_new_family_of_generalization_bounds_supp/klbound/f-CMI/nnlib/.git/logs/
- __MACOSX/a_new_family_of_generalization_bounds_supp/klbound/f-CMI/nnlib/.git/._logs
- a_new_family_of_generalization_bounds_supp/klbound/f-CMI/nnlib/.git/description
- __MACOSX/a_new_family_of_generalization_bounds_supp/klbound/f-CMI/nnlib/.git/._description
- a_new_family_of_generalization_bounds_supp/klbound/f-CMI/nnlib/.git/hooks/
- __MACOSX/a_new_family_of_generalization_bounds_supp/klbound/f-CMI/nnlib/.git/._hooks
- a_new_family_of_generalization_bounds_supp/klbound/f-CMI/nnlib/.git/refs/
- __MACOSX/a_new_family_of_generalization_bounds_supp/klbound/f-CMI/nnlib/.git/._refs
- a_new_family_of_generalization_bounds_supp/klbound/f-CMI/nnlib/.git/index
- __MACOSX/a_new_family_of_generalization_bounds_supp/klbound/f-CMI/nnlib/.git/._index
- a_new_family_of_generalization_bounds_supp/klbound/f-CMI/nnlib/.git/branches/
- __MACOSX/a_new_family_of_generalization_bounds_supp/klbound/f-CMI/nnlib/.git/._branches
- a_new_family_of_generalization_bounds_supp/klbound/f-CMI/nnlib/.git/packed-refs
- __MACOSX/a_new_family_of_generalization_bounds_supp/klbound/f-CMI/nnlib/.git/._packed-refs
- a_new_family_of_generalization_bounds_supp/klbound/f-CMI/scripts/__pycache__/__init__.cpython-37.pyc
- __MACOSX/a_new_family_of_generalization_bounds_supp/klbound/f-CMI/scripts/__pycache__/.___init__.cpython-37.pyc
- a_new_family_of_generalization_bounds_supp/klbound/f-CMI/scripts/__pycache__/fcmi_train_classifier.cpython-37.pyc
- __MACOSX/a_new_family_of_generalization_bounds_supp/klbound/f-CMI/scripts/__pycache__/._fcmi_train_classifier.cpython-37.pyc
- a_new_family_of_generalization_bounds_supp/klbound/f-CMI/modules/__pycache__/data_utils.cpython-37.pyc
- __MACOSX/a_new_family_of_generalization_bounds_supp/klbound/f-CMI/modules/__pycache__/._data_utils.cpython-37.pyc
- a_new_family_of_generalization_bounds_supp/klbound/f-CMI/modules/__pycache__/bound_utils.cpython-37.pyc
- __MACOSX/a_new_family_of_generalization_bounds_supp/klbound/f-CMI/modules/__pycache__/._bound_utils.cpython-37.pyc
- a_new_family_of_generalization_bounds_supp/klbound/f-CMI/modules/__pycache__/nn_utils.cpython-37.pyc
- __MACOSX/a_new_family_of_generalization_bounds_supp/klbound/f-CMI/modules/__pycache__/._nn_utils.cpython-37.pyc
- a_new_family_of_generalization_bounds_supp/klbound/f-CMI/modules/__pycache__/__init__.cpython-37.pyc
- __MACOSX/a_new_family_of_generalization_bounds_supp/klbound/f-CMI/modules/__pycache__/.___init__.cpython-37.pyc
- a_new_family_of_generalization_bounds_supp/klbound/f-CMI/nnlib/nnlib/data_utils/abstract.py
- __MACOSX/a_new_family_of_generalization_bounds_supp/klbound/f-CMI/nnlib/nnlib/data_utils/._abstract.py
- a_new_family_of_generalization_bounds_supp/klbound/f-CMI/nnlib/nnlib/data_utils/birds.py
- __MACOSX/a_new_family_of_generalization_bounds_supp/klbound/f-CMI/nnlib/nnlib/data_utils/._birds.py
- a_new_family_of_generalization_bounds_supp/klbound/f-CMI/nnlib/nnlib/data_utils/cats_and_dogs.py
- __MACOSX/a_new_family_of_generalization_bounds_supp/klbound/f-CMI/nnlib/nnlib/data_utils/._cats_and_dogs.py
- a_new_family_of_generalization_bounds_supp/klbound/f-CMI/nnlib/nnlib/data_utils/oxford_flowers_102.py
- __MACOSX/a_new_family_of_generalization_bounds_supp/klbound/f-CMI/nnlib/nnlib/data_utils/._oxford_flowers_102.py
- a_new_family_of_generalization_bounds_supp/klbound/f-CMI/nnlib/nnlib/data_utils/cassava.py
- __MACOSX/a_new_family_of_generalization_bounds_supp/klbound/f-CMI/nnlib/nnlib/data_utils/._cassava.py
- a_new_family_of_generalization_bounds_supp/klbound/f-CMI/nnlib/nnlib/data_utils/resources/
- __MACOSX/a_new_family_of_generalization_bounds_supp/klbound/f-CMI/nnlib/nnlib/data_utils/._resources
- a_new_family_of_generalization_bounds_supp/klbound/f-CMI/nnlib/nnlib/data_utils/imagenet.py
- __MACOSX/a_new_family_of_generalization_bounds_supp/klbound/f-CMI/nnlib/nnlib/data_utils/._imagenet.py
- a_new_family_of_generalization_bounds_supp/klbound/f-CMI/nnlib/nnlib/data_utils/fashion_mnist.py
- __MACOSX/a_new_family_of_generalization_bounds_supp/klbound/f-CMI/nnlib/nnlib/data_utils/._fashion_mnist.py
- a_new_family_of_generalization_bounds_supp/klbound/f-CMI/nnlib/nnlib/data_utils/__init__.py
- __MACOSX/a_new_family_of_generalization_bounds_supp/klbound/f-CMI/nnlib/nnlib/data_utils/.___init__.py
- a_new_family_of_generalization_bounds_supp/klbound/f-CMI/nnlib/nnlib/data_utils/__pycache__/
- __MACOSX/a_new_family_of_generalization_bounds_supp/klbound/f-CMI/nnlib/nnlib/data_utils/.___pycache__
- a_new_family_of_generalization_bounds_supp/klbound/f-CMI/nnlib/nnlib/data_utils/svhn.py
- __MACOSX/a_new_family_of_generalization_bounds_supp/klbound/f-CMI/nnlib/nnlib/data_utils/._svhn.py
- a_new_family_of_generalization_bounds_supp/klbound/f-CMI/nnlib/nnlib/data_utils/noise_tools.py
- __MACOSX/a_new_family_of_generalization_bounds_supp/klbound/f-CMI/nnlib/nnlib/data_utils/._noise_tools.py
- a_new_family_of_generalization_bounds_supp/klbound/f-CMI/nnlib/nnlib/data_utils/tensorflow.py
- __MACOSX/a_new_family_of_generalization_bounds_supp/klbound/f-CMI/nnlib/nnlib/data_utils/._tensorflow.py
- a_new_family_of_generalization_bounds_supp/klbound/f-CMI/nnlib/nnlib/data_utils/celeba.py
- __MACOSX/a_new_family_of_generalization_bounds_supp/klbound/f-CMI/nnlib/nnlib/data_utils/._celeba.py
- a_new_family_of_generalization_bounds_supp/klbound/f-CMI/nnlib/nnlib/data_utils/wrappers.py
- __MACOSX/a_new_family_of_generalization_bounds_supp/klbound/f-CMI/nnlib/nnlib/data_utils/._wrappers.py
- a_new_family_of_generalization_bounds_supp/klbound/f-CMI/nnlib/nnlib/data_utils/cifar.py
- __MACOSX/a_new_family_of_generalization_bounds_supp/klbound/f-CMI/nnlib/nnlib/data_utils/._cifar.py
- a_new_family_of_generalization_bounds_supp/klbound/f-CMI/nnlib/nnlib/data_utils/dsprites.py
- __MACOSX/a_new_family_of_generalization_bounds_supp/klbound/f-CMI/nnlib/nnlib/data_utils/._dsprites.py
- a_new_family_of_generalization_bounds_supp/klbound/f-CMI/nnlib/nnlib/data_utils/emnist.py
- __MACOSX/a_new_family_of_generalization_bounds_supp/klbound/f-CMI/nnlib/nnlib/data_utils/._emnist.py
- a_new_family_of_generalization_bounds_supp/klbound/f-CMI/nnlib/nnlib/data_utils/cars.py
- __MACOSX/a_new_family_of_generalization_bounds_supp/klbound/f-CMI/nnlib/nnlib/data_utils/._cars.py
- a_new_family_of_generalization_bounds_supp/klbound/f-CMI/nnlib/nnlib/data_utils/clothing1m.py
- __MACOSX/a_new_family_of_generalization_bounds_supp/klbound/f-CMI/nnlib/nnlib/data_utils/._clothing1m.py
- a_new_family_of_generalization_bounds_supp/klbound/f-CMI/nnlib/nnlib/data_utils/base.py
- __MACOSX/a_new_family_of_generalization_bounds_supp/klbound/f-CMI/nnlib/nnlib/data_utils/._base.py
- a_new_family_of_generalization_bounds_supp/klbound/f-CMI/nnlib/nnlib/data_utils/torch_extensions/
- __MACOSX/a_new_family_of_generalization_bounds_supp/klbound/f-CMI/nnlib/nnlib/data_utils/._torch_extensions
- a_new_family_of_generalization_bounds_supp/klbound/f-CMI/nnlib/nnlib/data_utils/mnist.py
- __MACOSX/a_new_family_of_generalization_bounds_supp/klbound/f-CMI/nnlib/nnlib/data_utils/._mnist.py
- a_new_family_of_generalization_bounds_supp/klbound/f-CMI/nnlib/nnlib/__pycache__/callbacks.cpython-37.pyc
- __MACOSX/a_new_family_of_generalization_bounds_supp/klbound/f-CMI/nnlib/nnlib/__pycache__/._callbacks.cpython-37.pyc
- a_new_family_of_generalization_bounds_supp/klbound/f-CMI/nnlib/nnlib/__pycache__/training.cpython-37.pyc
- __MACOSX/a_new_family_of_generalization_bounds_supp/klbound/f-CMI/nnlib/nnlib/__pycache__/._training.cpython-37.pyc
- a_new_family_of_generalization_bounds_supp/klbound/f-CMI/nnlib/nnlib/__pycache__/metrics.cpython-37.pyc
- __MACOSX/a_new_family_of_generalization_bounds_supp/klbound/f-CMI/nnlib/nnlib/__pycache__/._metrics.cpython-37.pyc
- a_new_family_of_generalization_bounds_supp/klbound/f-CMI/nnlib/nnlib/__pycache__/losses.cpython-37.pyc
- __MACOSX/a_new_family_of_generalization_bounds_supp/klbound/f-CMI/nnlib/nnlib/__pycache__/._losses.cpython-37.pyc
- a_new_family_of_generalization_bounds_supp/klbound/f-CMI/nnlib/nnlib/__pycache__/visualizations.cpython-37.pyc
- __MACOSX/a_new_family_of_generalization_bounds_supp/klbound/f-CMI/nnlib/nnlib/__pycache__/._visualizations.cpython-37.pyc
- a_new_family_of_generalization_bounds_supp/klbound/f-CMI/nnlib/nnlib/__pycache__/matplotlib_utils.cpython-37.pyc
- __MACOSX/a_new_family_of_generalization_bounds_supp/klbound/f-CMI/nnlib/nnlib/__pycache__/._matplotlib_utils.cpython-37.pyc
- a_new_family_of_generalization_bounds_supp/klbound/f-CMI/nnlib/nnlib/__pycache__/nn_utils.cpython-37.pyc
- __MACOSX/a_new_family_of_generalization_bounds_supp/klbound/f-CMI/nnlib/nnlib/__pycache__/._nn_utils.cpython-37.pyc
- a_new_family_of_generalization_bounds_supp/klbound/f-CMI/nnlib/nnlib/__pycache__/method_utils.cpython-37.pyc
- __MACOSX/a_new_family_of_generalization_bounds_supp/klbound/f-CMI/nnlib/nnlib/__pycache__/._method_utils.cpython-37.pyc
- a_new_family_of_generalization_bounds_supp/klbound/f-CMI/nnlib/nnlib/__pycache__/utils.cpython-37.pyc
- __MACOSX/a_new_family_of_generalization_bounds_supp/klbound/f-CMI/nnlib/nnlib/__pycache__/._utils.cpython-37.pyc
- a_new_family_of_generalization_bounds_supp/klbound/f-CMI/nnlib/nnlib/__pycache__/__init__.cpython-37.pyc
- __MACOSX/a_new_family_of_generalization_bounds_supp/klbound/f-CMI/nnlib/nnlib/__pycache__/.___init__.cpython-37.pyc
- a_new_family_of_generalization_bounds_supp/klbound/f-CMI/nnlib/nnlib/__pycache__/gradients.cpython-37.pyc
- __MACOSX/a_new_family_of_generalization_bounds_supp/klbound/f-CMI/nnlib/nnlib/__pycache__/._gradients.cpython-37.pyc
- a_new_family_of_generalization_bounds_supp/klbound/f-CMI/nnlib/nnlib/networks/resnet_cifar.py
- __MACOSX/a_new_family_of_generalization_bounds_supp/klbound/f-CMI/nnlib/nnlib/networks/._resnet_cifar.py
- a_new_family_of_generalization_bounds_supp/klbound/f-CMI/nnlib/nnlib/networks/conditional_distributions.py
- __MACOSX/a_new_family_of_generalization_bounds_supp/klbound/f-CMI/nnlib/nnlib/networks/._conditional_distributions.py
- a_new_family_of_generalization_bounds_supp/klbound/f-CMI/nnlib/nnlib/networks/__init__.py
- __MACOSX/a_new_family_of_generalization_bounds_supp/klbound/f-CMI/nnlib/nnlib/networks/.___init__.py
- a_new_family_of_generalization_bounds_supp/klbound/f-CMI/nnlib/nnlib/networks/__pycache__/
- __MACOSX/a_new_family_of_generalization_bounds_supp/klbound/f-CMI/nnlib/nnlib/networks/.___pycache__
- a_new_family_of_generalization_bounds_supp/klbound/f-CMI/nnlib/nnlib/networks/resnet18k.py
- __MACOSX/a_new_family_of_generalization_bounds_supp/klbound/f-CMI/nnlib/nnlib/networks/._resnet18k.py
- a_new_family_of_generalization_bounds_supp/klbound/f-CMI/nnlib/.git/objects/pack/
- __MACOSX/a_new_family_of_generalization_bounds_supp/klbound/f-CMI/nnlib/.git/objects/._pack
- a_new_family_of_generalization_bounds_supp/klbound/f-CMI/nnlib/.git/objects/info/
- __MACOSX/a_new_family_of_generalization_bounds_supp/klbound/f-CMI/nnlib/.git/objects/._info
- a_new_family_of_generalization_bounds_supp/klbound/f-CMI/nnlib/.git/info/exclude
- __MACOSX/a_new_family_of_generalization_bounds_supp/klbound/f-CMI/nnlib/.git/info/._exclude
- a_new_family_of_generalization_bounds_supp/klbound/f-CMI/nnlib/.git/logs/HEAD
- __MACOSX/a_new_family_of_generalization_bounds_supp/klbound/f-CMI/nnlib/.git/logs/._HEAD
- a_new_family_of_generalization_bounds_supp/klbound/f-CMI/nnlib/.git/logs/refs/
- __MACOSX/a_new_family_of_generalization_bounds_supp/klbound/f-CMI/nnlib/.git/logs/._refs
- a_new_family_of_generalization_bounds_supp/klbound/f-CMI/nnlib/.git/hooks/commit-msg.sample
- __MACOSX/a_new_family_of_generalization_bounds_supp/klbound/f-CMI/nnlib/.git/hooks/._commit-msg.sample
- a_new_family_of_generalization_bounds_supp/klbound/f-CMI/nnlib/.git/hooks/pre-rebase.sample
- __MACOSX/a_new_family_of_generalization_bounds_supp/klbound/f-CMI/nnlib/.git/hooks/._pre-rebase.sample
- a_new_family_of_generalization_bounds_supp/klbound/f-CMI/nnlib/.git/hooks/pre-commit.sample
- __MACOSX/a_new_family_of_generalization_bounds_supp/klbound/f-CMI/nnlib/.git/hooks/._pre-commit.sample
- a_new_family_of_generalization_bounds_supp/klbound/f-CMI/nnlib/.git/hooks/applypatch-msg.sample
- __MACOSX/a_new_family_of_generalization_bounds_supp/klbound/f-CMI/nnlib/.git/hooks/._applypatch-msg.sample
- a_new_family_of_generalization_bounds_supp/klbound/f-CMI/nnlib/.git/hooks/fsmonitor-watchman.sample
- __MACOSX/a_new_family_of_generalization_bounds_supp/klbound/f-CMI/nnlib/.git/hooks/._fsmonitor-watchman.sample
- a_new_family_of_generalization_bounds_supp/klbound/f-CMI/nnlib/.git/hooks/pre-receive.sample
- __MACOSX/a_new_family_of_generalization_bounds_supp/klbound/f-CMI/nnlib/.git/hooks/._pre-receive.sample
- a_new_family_of_generalization_bounds_supp/klbound/f-CMI/nnlib/.git/hooks/prepare-commit-msg.sample
- __MACOSX/a_new_family_of_generalization_bounds_supp/klbound/f-CMI/nnlib/.git/hooks/._prepare-commit-msg.sample
- a_new_family_of_generalization_bounds_supp/klbound/f-CMI/nnlib/.git/hooks/post-update.sample
- __MACOSX/a_new_family_of_generalization_bounds_supp/klbound/f-CMI/nnlib/.git/hooks/._post-update.sample
- a_new_family_of_generalization_bounds_supp/klbound/f-CMI/nnlib/.git/hooks/pre-applypatch.sample
- __MACOSX/a_new_family_of_generalization_bounds_supp/klbound/f-CMI/nnlib/.git/hooks/._pre-applypatch.sample
- a_new_family_of_generalization_bounds_supp/klbound/f-CMI/nnlib/.git/hooks/pre-push.sample
- __MACOSX/a_new_family_of_generalization_bounds_supp/klbound/f-CMI/nnlib/.git/hooks/._pre-push.sample
- a_new_family_of_generalization_bounds_supp/klbound/f-CMI/nnlib/.git/hooks/update.sample
- __MACOSX/a_new_family_of_generalization_bounds_supp/klbound/f-CMI/nnlib/.git/hooks/._update.sample
- a_new_family_of_generalization_bounds_supp/klbound/f-CMI/nnlib/.git/refs/heads/
- __MACOSX/a_new_family_of_generalization_bounds_supp/klbound/f-CMI/nnlib/.git/refs/._heads
- a_new_family_of_generalization_bounds_supp/klbound/f-CMI/nnlib/.git/refs/tags/
- __MACOSX/a_new_family_of_generalization_bounds_supp/klbound/f-CMI/nnlib/.git/refs/._tags
- a_new_family_of_generalization_bounds_supp/klbound/f-CMI/nnlib/.git/refs/remotes/
- __MACOSX/a_new_family_of_generalization_bounds_supp/klbound/f-CMI/nnlib/.git/refs/._remotes
- a_new_family_of_generalization_bounds_supp/klbound/f-CMI/nnlib/nnlib/data_utils/resources/10-random-colors.npy
- __MACOSX/a_new_family_of_generalization_bounds_supp/klbound/f-CMI/nnlib/nnlib/data_utils/resources/._10-random-colors.npy
- a_new_family_of_generalization_bounds_supp/klbound/f-CMI/nnlib/nnlib/data_utils/resources/rainbow-7.npy
[truncated: 47 more entries]
