# Supplementary material
Source: ML conference proceedings conference paper supplement (https://proceedings.neurips.cc/paper_files/paper/2022/hash/41b6674c28a9b93ec8d22a53ca25bc3b-Abstract.html)
Supplement: Supplementary file 1 [file 41b6674c28a9b93ec8d22a53ca25bc3b-Supplemental-Conference.zip › a_new_family_of_generalization_bounds_supp/klbound/f-CMI/configs/binary-mnist-4layer-deep-CNN.json]

{
  "classifier": [
    {"type": "conv", "filters": 32, "kernel_size": 4, "stride": 2, "padding": 1, "activation": "relu", "batch_norm": true},
    {"type": "conv", "filters": 32, "kernel_size": 4, "stride": 2, "padding": 1, "activation": "relu", "batch_norm": true},
    {"type": "conv", "filters": 64, "kernel_size": 3, "stride": 1, "padding": 1, "activation": "relu", "batch_norm": true},
    {"type": "conv", "filters": 64, "kernel_size": 3, "stride": 1, "padding": 1, "activation": "relu", "batch_norm": true},
    {"type": "conv", "filters": 64, "kernel_size": 3, "stride": 1, "padding": 0, "activation": "relu", "batch_norm": true},
    {"type": "conv", "filters": 256, "kernel_size": 3, "stride": 1, "padding": 0, "activation": "relu", "batch_norm": true},
    {"type": "flatten"},
    {"type": "fc", "dim": 128, "activation": "relu"},
    {"type": "fc", "dim": 2}
  ]
}
