# Supplementary material
Source: ML conference proceedings conference paper supplement (https://proceedings.neurips.cc/paper_files/paper/2022/hash/41b6674c28a9b93ec8d22a53ca25bc3b-Abstract.html)
Supplement: Supplementary file 1 [file 41b6674c28a9b93ec8d22a53ca25bc3b-Supplemental-Conference.zip › a_new_family_of_generalization_bounds_supp/klbound/f-CMI/configs/resnet_cifar10.json]

{
  "classifier": {
    "net": "resnet34-cifar",
    "num_classes": 10
  },
  "q-network": {
    "net": "resnet34-cifar",
    "num_classes": 10
  }
}
