# Supplementary material
Source: ML conference proceedings conference paper supplement (https://proceedings.neurips.cc/paper_files/paper/2022/hash/41b6674c28a9b93ec8d22a53ca25bc3b-Abstract.html)
Supplement: Supplementary file 1 [file 41b6674c28a9b93ec8d22a53ca25bc3b-Supplemental-Conference.zip › a_new_family_of_generalization_bounds_supp/klbound/f-CMI/modules/data_utils.py]

import nnlib.nnlib.data_utils.base


def load_data_from_arguments(args, build_loaders=True):
    data_selector = nnlib.nnlib.data_utils.base.DataSelector()
    return data_selector.parse(args, build_loaders=build_loaders)
