# Supplementary material
Source: ML conference proceedings conference paper supplement (https://proceedings.neurips.cc/paper_files/paper/2022/hash/41b6674c28a9b93ec8d22a53ca25bc3b-Abstract.html)
Supplement: Supplementary file 1 [file 41b6674c28a9b93ec8d22a53ca25bc3b-Supplemental-Conference.zip › a_new_family_of_generalization_bounds_supp/klbound/f-CMI/modules/nn_utils.py]

from nnlib.nnlib import nn_utils as nn_utils_base


def parse_network_from_config(args, input_shape, detailed_output=False):
    # parse project-specific networks
    # none in this case

    # parse general-case networks
    net, output_shape = nn_utils_base.parse_network_from_config(args, input_shape)

    if detailed_output:
        net = nn_utils_base.StandardNetworkWrapper(net, output_name='pred')

    return net, output_shape
