# Supplementary material
Source: ML conference proceedings conference paper supplement (https://proceedings.neurips.cc/paper_files/paper/2022/hash/41b6674c28a9b93ec8d22a53ca25bc3b-Abstract.html)
Supplement: Supplementary file 1 [file 41b6674c28a9b93ec8d22a53ca25bc3b-Supplemental-Conference.zip › a_new_family_of_generalization_bounds_supp/klbound/f-CMI/nnlib/nnlib/data_utils/cassava.py]

from torchvision import transforms
import torch

from .base import log_call_parameters
from .abstract import StandardVisionDataset
from .tensorflow import SimpleTensorFlowDataset


class Cassava(StandardVisionDataset):
    @log_call_parameters
    def __init__(self, data_augmentation: bool = False, **kwargs):
        super(Cassava, self).__init__(**kwargs)
        self.data_augmentation = data_augmentation

    @property
    def dataset_name(self) -> str:
        return "cassava"

    @property
    def means(self):
        return torch.tensor([0.485, 0.456, 0.406])

    @property
    def stds(self):
        return torch.tensor([0.229, 0.224, 0.225])

    @property
    def train_transforms(self):
        if not self.data_augmentation:
            return self.test_transforms

        return transforms.Compose([
            transforms.RandomResizedCrop(224),
            transforms.RandomHorizontalFlip(),
            transforms.ToTensor(),
            self.normalize_transform,
        ])

    @property
    def test_transforms(self):
        return transforms.Compose([
            transforms.Resize(256),
            transforms.CenterCrop(224),
            transforms.ToTensor(),
            self.normalize_transform,
        ])

    def raw_dataset(self, data_dir: str, download: bool, split: str, transform):
        assert split in ['train', 'val', 'test']
        if split == 'val':
            split = 'validation'
        return SimpleTensorFlowDataset(name='cassava', data_dir=data_dir,
                                       split=split, transform=transform,
                                       as_supervised=True, download=download)
