# Supplementary material
Source: ML conference proceedings conference paper supplement (https://proceedings.neurips.cc/paper_files/paper/2022/hash/41b6674c28a9b93ec8d22a53ca25bc3b-Abstract.html)
Supplement: Supplementary file 1 [file 41b6674c28a9b93ec8d22a53ca25bc3b-Supplemental-Conference.zip › a_new_family_of_generalization_bounds_supp/klbound/f-CMI/nnlib/nnlib/data_utils/mnist.py]

from abc import abstractmethod

from torchvision import transforms, datasets
import torch

from .base import log_call_parameters
from .abstract import StandardVisionDataset
from .noise_tools import get_uniform_error_corruption_fn


class MNIST(StandardVisionDataset):
    @log_call_parameters
    def __init__(self, data_augmentation: bool = False, **kwargs):
        super(MNIST, self).__init__(**kwargs)
        self.data_augmentation = data_augmentation

    @property
    def dataset_name(self) -> str:
        return "mnist"

    @property
    def means(self):
        return torch.tensor([0.456])

    @property
    def stds(self):
        return torch.tensor([0.224])

    @property
    def train_transforms(self):
        if not self.data_augmentation:
            return self.test_transforms
        return transforms.Compose([transforms.RandomCrop(28, 4),
                                   transforms.ToTensor(),
                                   self.normalize_transform])

    @property
    def test_transforms(self):
        return transforms.Compose([
            transforms.ToTensor(),
            self.normalize_transform
        ])

    def raw_dataset(self, data_dir: str, download: bool, split: str, transform):
        assert split in ['train', 'val', 'test']
        if split == 'val':
            return None  # no predetermined validation set
        return datasets.MNIST(data_dir, download=download, train=(split == 'train'),
                              transform=transform)


class NoisyMNIST(MNIST):
    def __init__(self, data_augmentation: bool = False, clean_validation: bool = False, **kwargs):
        super(NoisyMNIST, self).__init__(data_augmentation=data_augmentation, **kwargs)
        self.clean_validation = clean_validation

    @abstractmethod
    def corruption_fn(self, dataset):
        raise NotImplementedError('corruption_fn is not implemented')

    def post_process_datasets(self, train_data, val_data, test_data, info=None):
        is_corrupted = self.corruption_fn(train_data)
        if not self.clean_validation:
            _ = self.corruption_fn(val_data)
        return train_data, val_data, test_data, is_corrupted


class UniformNoiseMNIST(NoisyMNIST):
    @log_call_parameters
    def __init__(self, error_prob: float, data_augmentation: bool = False, clean_validation: bool = False, **kwargs):
        super(UniformNoiseMNIST, self).__init__(data_augmentation=data_augmentation,
                                                clean_validation=clean_validation,
                                                **kwargs)
        self._corruption_fn = get_uniform_error_corruption_fn(error_prob=error_prob, n_classes=10)

    def corruption_fn(self, dataset):
        return self._corruption_fn(dataset)
