# Supplementary material
Source: ML conference proceedings conference paper supplement (https://proceedings.neurips.cc/paper_files/paper/2022/hash/41b6674c28a9b93ec8d22a53ca25bc3b-Abstract.html)
Supplement: Supplementary file 1 [file 41b6674c28a9b93ec8d22a53ca25bc3b-Supplemental-Conference.zip › a_new_family_of_generalization_bounds_supp/klbound/f-CMI/nnlib/nnlib/losses.py]

import torch
import torch.nn.functional as F


def binary_cross_entropy(target, pred):
    target = target.reshape((target.shape[0], -1))
    pred = pred.reshape((pred.shape[0], -1))
    ce = F.binary_cross_entropy(pred, target, reduction='none')
    ce = torch.sum(ce, dim=1)
    ce = torch.mean(ce, dim=0)
    return ce


def mse(target, pred):
    target = target.reshape((target.shape[0], -1))
    pred = pred.reshape((pred.shape[0], -1))
    mse = torch.sum((target - pred) ** 2, dim=1)
    mse = torch.mean(mse, dim=0)
    return mse


def mae(target, pred):
    target = target.reshape((target.shape[0], -1))
    pred = pred.reshape((pred.shape[0], -1))
    mad = torch.sum(torch.abs(target - pred), dim=1)
    mad = torch.mean(mad, dim=0)
    return mad


def get_classification_loss(target, logits, loss_function='ce'):
    """
    :param target: one-hot encoded vector
    :param logits: predicted logits (i.e. before softmax)
    :param loss_function: 'ce', 'mse', 'mae'
    """
    if loss_function == 'ce':
        return F.cross_entropy(input=logits, target=target.argmax(dim=1))
    if loss_function == 'mse':
        return mse(target, torch.softmax(logits, dim=1))
    if loss_function == 'mae':
        return mae(target, torch.softmax(logits, dim=1))
    raise NotImplementedError()
