# Supplementary material
Source: ML conference proceedings conference paper supplement (https://proceedings.neurips.cc/paper_files/paper/2022/hash/41b6674c28a9b93ec8d22a53ca25bc3b-Abstract.html)
Supplement: Supplementary file 1 [file 41b6674c28a9b93ec8d22a53ca25bc3b-Supplemental-Conference.zip › a_new_family_of_generalization_bounds_supp/klbound/f-CMI/nnlib/nnlib/networks/resnet_cifar.py]

import torch.nn as nn
import torch.nn.functional as F


class BasicBlock(nn.Module):
    expansion = 1

    def __init__(self, in_planes, planes, stride=1, norm_layer=nn.BatchNorm2d):
        super(BasicBlock, self).__init__()
        self.conv1 = nn.Conv2d(in_planes, planes, kernel_size=3, stride=stride, padding=1, bias=False)
        self.bn1 = norm_layer(planes)
        self.conv2 = nn.Conv2d(planes, planes, kernel_size=3, stride=1, padding=1, bias=False)
        self.bn2 = norm_layer(planes)

        self.shortcut = nn.Sequential()
        if stride != 1 or in_planes != self.expansion*planes:
            self.shortcut = nn.Sequential(
                nn.Conv2d(in_planes, self.expansion*planes, kernel_size=1, stride=stride, bias=False),
                norm_layer(self.expansion*planes)
            )

    def forward(self, x):
        out = F.relu(self.bn1(self.conv1(x)))
        out = self.bn2(self.conv2(out))
        out += self.shortcut(x)
        out = F.relu(out)
        return out


class Bottleneck(nn.Module):
    expansion = 4

    def __init__(self, in_planes, planes, stride=1, norm_layer=nn.BatchNorm2d):
        super(Bottleneck, self).__init__()
        self.conv1 = nn.Conv2d(in_planes, planes, kernel_size=1, bias=False)
        self.bn1 = norm_layer(planes)
        self.conv2 = nn.Conv2d(planes, planes, kernel_size=3, stride=stride, padding=1, bias=False)
        self.bn2 = norm_layer(planes)
        self.conv3 = nn.Conv2d(planes, self.expansion*planes, kernel_size=1, bias=False)
        self.bn3 = norm_layer(self.expansion*planes)

        self.shortcut = nn.Sequential()
        if stride != 1 or in_planes != self.expansion*planes:
            self.shortcut = nn.Sequential(
                nn.Conv2d(in_planes, self.expansion*planes, kernel_size=1, stride=stride, bias=False),
                norm_layer(self.expansion*planes)
            )

    def forward(self, x):
        out = F.relu(self.bn1(self.conv1(x)))
        out = F.relu(self.bn2(self.conv2(out)))
        out = self.bn3(self.conv3(out))
        out += self.shortcut(x)
        out = F.relu(out)
        return out


class ResNet(nn.Module):
    def __init__(self, block, num_blocks, num_classes=10, norm_layer=nn.BatchNorm2d):
        super(ResNet, self).__init__()
        self.in_planes = 64

        self.conv1 = nn.Conv2d(3, 64, kernel_size=3, stride=1, padding=1, bias=False)
        self.bn1 = norm_layer(64)
        self.layer1 = self._make_layer(block, 64, num_blocks[0], stride=1, norm_layer=norm_layer)
        self.layer2 = self._make_layer(block, 128, num_blocks[1], stride=2, norm_layer=norm_layer)
        self.layer3 = self._make_layer(block, 256, num_blocks[2], stride=2, norm_layer=norm_layer)
        self.layer4 = self._make_layer(block, 512, num_blocks[3], stride=2, norm_layer=norm_layer)
        self.linear = nn.Linear(512*block.expansion, num_classes)

    def _make_layer(self, block, planes, num_blocks, stride, norm_layer):
        strides = [stride] + [1]*(num_blocks-1)
        layers = []
        for stride in strides:
            layers.append(block(self.in_planes, planes, stride, norm_layer=norm_layer))
            self.in_planes = planes * block.expansion
        return nn.Sequential(*layers)

    def forward(self, x):
        out = F.relu(self.bn1(self.conv1(x)))
        out = self.layer1(out)
        out = self.layer2(out)
        out = self.layer3(out)
        out = self.layer4(out)
        out = F.avg_pool2d(out, 4)
        out = out.view(out.size(0), -1)
        out = self.linear(out)
        return out


def resnet18(num_classes=10, norm_layer=nn.BatchNorm2d):
    return ResNet(BasicBlock, [2, 2, 2, 2], num_classes=num_classes, norm_layer=norm_layer)


def resnet34(num_classes=10, norm_layer=nn.BatchNorm2d):
    return ResNet(BasicBlock, [3, 4, 6, 3], num_classes=num_classes, norm_layer=norm_layer)


def resnet50(num_classes=10, norm_layer=nn.BatchNorm2d):
    return ResNet(Bottleneck, [3, 4, 6, 3], num_classes=num_classes, norm_layer=norm_layer)


def resnet101(num_classes=10, norm_layer=nn.BatchNorm2d):
    return ResNet(Bottleneck, [3, 4, 23, 3], num_classes=num_classes, norm_layer=norm_layer)


def resnet152(num_classes=10, norm_layer=nn.BatchNorm2d):
    return ResNet(Bottleneck, [3, 8, 36, 3], num_classes=num_classes, norm_layer=norm_layer)
