# Supplementary material
Source: ML conference proceedings conference paper supplement (https://proceedings.neurips.cc/paper_files/paper/2022/hash/41b6674c28a9b93ec8d22a53ca25bc3b-Abstract.html)
Supplement: Supplementary file 1 [file 41b6674c28a9b93ec8d22a53ca25bc3b-Supplemental-Conference.zip › a_new_family_of_generalization_bounds_supp/klbound/f-CMI/nnlib/nnlib/utils.py]

from collections import defaultdict
import os
import re
import inspect
import copy
import time
import random

from torch.utils.data import Subset, DataLoader
from tqdm import tqdm
import torch
import numpy as np


def make_path(path):
    if not os.path.exists(path):
        os.makedirs(path)


def to_numpy(x):
    if isinstance(x, np.ndarray):
        return x
    if x.requires_grad:
        x = x.detach()
    if x.device.type != 'cpu':
        x = x.cpu()
    return x.numpy()


def to_tensor(x, device='cpu', dtype=torch.float):
    if isinstance(x, torch.Tensor):
        return x.to(device)
    return torch.tensor(x, dtype=dtype, device=device)


def to_scalar(x):
    if isinstance(x, torch.Tensor):
        assert x.ndim == 0
        return x.item()
    if isinstance(x, np.ndarray):
        assert x.ndim == 0
        return x.item()
    return x


def to_cpu(x):
    if isinstance(x, torch.Tensor):
        return x.cpu()
    return [to_cpu(xt) for xt in x]


def set_requires_grad(model, value):
    for p in model.parameters():
        p.requires_grad = value


def zero_grad(model):
    for param in model.parameters():
        param.grad = torch.zeros_like(param)


def get_num_parameters(model):
    n_params = 0
    for p in model.parameters():
        n_params += p.nelement()
    return n_params


def put_always_eval_mode(model):
    model.eval()
    model._old_train = model.train
    model.train = (lambda mode=False: model._old_train(False))


def save(model, path, optimizer=None, scheduler=None):
    print('Saving the model into {}'.format(path))
    make_path(os.path.dirname(path))

    save_dict = dict()
    save_dict['model'] = model.state_dict()
    save_dict['args'] = model.args

    # if the model has extra arguments or state variables to save
    if hasattr(model, 'attributes_to_save'):
        save_dict['model_attr'] = model.attributes_to_save()

    if optimizer is not None:
        save_dict['optimizer'] = optimizer.state_dict()

    if scheduler is not None:
        save_dict['scheduler'] = scheduler.state_dict()

    torch.save(save_dict, path)


def load(path, methods, device=None, verbose=False, update_args_dict=None):
    print("Loading the model from {}".format(path))
    saved_dict = torch.load(path, map_location=device)
    args = saved_dict['args']
    if device is not None:
        args['device'] = device

    if update_args_dict is not None:
        for k, v in update_args_dict.items():
            args[k] = v

    model_class = getattr(methods, args['class'])
    model = model_class(**args)

    if verbose:
        print(model)

    model.load_state_dict(saved_dict['model'])

    # load the saved state attributes
    if 'model_attr' in saved_dict:
        for k, v in saved_dict['model_attr'].items():
            setattr(model, k, v)

    model.eval()
    return model


def with_no_grad(init_fn):
    def wrapper(*args, **kwargs):
        with torch.no_grad():
            ret = init_fn(*args, **kwargs)
        return ret

    return wrapper


@with_no_grad
def apply_on_dataset(model, dataset, batch_size=256, cpu=True, description="",
                     output_keys_regexp='.*', max_num_examples=2**30,
                     num_workers=0, **kwargs):
    model.eval()

    if num_workers > 0:
        torch.multiprocessing.set_sharing_strategy('file_system')
        torch.multiprocessing.set_start_method('spawn', force=True)

    n_examples = min(len(dataset), max_num_examples)
    loader = DataLoader(dataset=Subset(dataset, range(n_examples)),
                        batch_size=batch_size, shuffle=False,
                        num_workers=num_workers)

    outputs = defaultdict(list)

    for inputs_batch, labels_batch in tqdm(loader, desc=description):
        if isinstance(inputs_batch, torch.Tensor):
            inputs_batch = [inputs_batch]
        if not isinstance(labels_batch, list):
            labels_batch = [labels_batch]
        outputs_batch = model.forward(inputs=inputs_batch, labels=labels_batch, **kwargs)
        for k, v in outputs_batch.items():
            if re.fullmatch(output_keys_regexp, k) is None:
                continue
            if cpu:
                v = to_cpu(v)
            outputs[k].append(v)

        # add labels if requested
        if re.fullmatch(output_keys_regexp, 'labels') is not None:
            for label_idx, label_tensor in enumerate(labels_batch):
                outputs[f'label_{label_idx}'].append(label_tensor)

    for k in outputs:
        outputs[k] = torch.cat(outputs[k], dim=0)
        assert len(outputs[k]) == n_examples

    return outputs


def capture_arguments_of_init(init_fn):
    def wrapper(self, *args, **kwargs):
        # get the signature, bind arguments, apply defaults, and convert to dictionary
        signature = inspect.signature(init_fn)
        bind_result = signature.bind(self, *args, **kwargs)
        bind_result.apply_defaults()
        argument_dict = bind_result.arguments

        # remove self
        argument_dict.pop('self')

        # remove kwargs and add its content to our dictionary
        # get the name of kwargs, usually this will be just "kwargs"
        kwargs_name = inspect.getfullargspec(init_fn).varkw
        if kwargs_name is not None:
            kw = argument_dict.pop(kwargs_name)
            for k, v in kw.items():
                argument_dict[k] = v

        # call the init function
        init_fn(self, *args, **kwargs)

        # add the class name
        argument_dict['class'] = self.__class__.__name__

        # write it in self
        self.args = argument_dict

    return wrapper


def atoi(text):
    if text.isdigit():
        return int(text)
    else:
        return text


def natural_keys(text):
    return [atoi(c) for c in re.split(r'(\d+)', text)]


def get_first_k_states(model_dir, k=8):
    saved_models = os.listdir(os.path.join(model_dir, 'checkpoints'))
    saved_models = filter(lambda x: x.find("epoch") != -1, saved_models)
    saved_models = sorted(saved_models, key=natural_keys)
    return saved_models[:k]


class SetTemporaryParams(object):
    def __init__(self, model, params):
        self.model = model
        self.params = params
        self.original_params = copy.deepcopy(dict(model.named_parameters()))

    def __enter__(self):
        with torch.no_grad():
            for k, v in self.model.named_parameters():
                v.data = self.params[k].data
        return self.model

    def __exit__(self, type, value, traceback):
        with torch.no_grad():
            for k, v in self.model.named_parameters():
                v.data = self.original_params[k].data


class Timing(object):
    def __init__(self, description):
        self.description = description

    def __enter__(self):
        print(self.description, '...')
        self._start_time = time.time()

    def __exit__(self, type, value, traceback):
        end_time = time.time()
        print(f'[{self.description}] time={end_time - self._start_time:.1f}s')


def call_fn_ignoring_unexpected_args(fn, *args, **kwargs):
    existing_arguments = inspect.signature(fn).parameters.values()
    existing_arguments = [p.name for p in existing_arguments]
    filtered_kwargs = {}
    for k, v in kwargs.items():
        if k in existing_arguments:
            filtered_kwargs[k] = v
    return fn(*args, **filtered_kwargs)


def set_seed(seed):
    torch.backends.cudnn.deterministic = True
    torch.backends.cudnn.benchmark = False
    torch.manual_seed(seed)
    torch.cuda.manual_seed_all(seed)
    np.random.seed(seed)
    random.seed(seed)


class NestedDict(dict):
    def __missing__(self, key):
        self[key] = type(self)()
        return self[key]
