# Supplementary material
Source: ML conference proceedings conference paper supplement (https://proceedings.neurips.cc/paper_files/paper/2022/hash/41b6674c28a9b93ec8d22a53ca25bc3b-Abstract.html)
Supplement: Supplementary file 1 [file 41b6674c28a9b93ec8d22a53ca25bc3b-Supplemental-Conference.zip › a_new_family_of_generalization_bounds_supp/klbound/f-CMI/nnlib/nnlib/visualizations.py]

""" Visualization routines to use for experiments.

These visualization tools will note save figures. That can be later done by
calling the savefig(fig, path) below. The purpose of this design is to make it
possible to use these tools in both jupyter notebooks and in ordinary scripts.
"""
import os

from sklearn.manifold import TSNE
import numpy as np
import torch

from . import utils
from .data_utils.base import revert_normalization
from .matplotlib_utils import import_matplotlib
from .data_utils.base import get_first_input


def get_image(x):
    """ Takes (1, H, W) or (3, H, W) and outputs (H, W, 3) """
    x = x.transpose((1, 2, 0))
    if x.shape[2] == 1:
        x = np.repeat(x, repeats=3, axis=2)
    return x


def savefig(fig, path):
    dir_name = os.path.dirname(path)
    if dir_name != '':
        utils.make_path(dir_name)
    fig.savefig(path)


def reconstruction_plot(model, train_data, val_data, n_samples=5, plt=None):
    """Plots reconstruction examples for training & validation sets."""
    model.eval()
    if plt is None:
        _, plt = import_matplotlib(agg=True, use_style=False)
    train_samples = [get_first_input(train_data, i) for i in range(n_samples)]
    val_samples = [get_first_input(val_data, i) for i in range(n_samples)]
    samples = torch.stack(train_samples + val_samples, dim=0)
    x_rec = model(inputs=[samples])['x_rec']
    x_rec = x_rec.reshape(samples.shape)
    samples = revert_normalization(samples, train_data)
    samples = utils.to_numpy(samples)
    x_rec = utils.to_numpy(x_rec)
    fig, ax = plt.subplots(nrows=2 * n_samples, ncols=2, figsize=(2, 2 * n_samples))
    for i in range(2 * n_samples):
        ax[i][0].imshow(get_image(samples[i]), vmin=0, vmax=1)
        ax[i][0].set_axis_off()
        ax[i][1].imshow(get_image(x_rec[i]), vmin=0, vmax=1)
        ax[i][1].set_axis_off()
    return fig, ax


def manifold_plot(model, example_shape, low=-1.0, high=+1.0, n_points=20, d1=0, d2=1, plt=None):
    """Plots reconstruction for varying dimensions d1 and d2, while the remaining dimensions are kept fixed."""
    model.eval()
    if plt is None:
        _, plt = import_matplotlib(agg=True, use_style=False)
    image = np.zeros((example_shape[0], n_points * example_shape[1], n_points * example_shape[2]), dtype=np.float32)

    z = np.random.uniform(low=low, high=high, size=(model.hidden_shape[-1],))
    z1_grid = np.linspace(low, high, n_points)
    z2_grid = np.linspace(low, high, n_points)

    for i, z1 in enumerate(z1_grid):
        for j, z2 in enumerate(z2_grid):
            cur_z = np.copy(z)
            z[d1] = z1
            z[d2] = z2
            cur_z = cur_z.reshape((1, -1))
            cur_z = utils.to_tensor(cur_z, device=model.device)
            x = model.decoder(cur_z)
            x = utils.to_numpy(x).reshape(example_shape)
            image[:, example_shape[1]*i: example_shape[1]*(i+1), example_shape[2]*j:example_shape[2]*(j+1)] = x
    fig, ax = plt.subplots(1, figsize=(10, 10))
    if image.shape[0] == 1:
        ax.imshow(image[0], vmin=0, vmax=1, cmap='gray')
    else:
        image = image.transpose((1, 2, 0))
        image = (255 * image).astype(np.uint8)
        ax.imshow(image)
    ax.axis('off')
    ax.set_ylabel('z_{}'.format(d1))
    ax.set_xlabel('z_{}'.format(d2))
    return fig, ax


def latent_scatter(model, data_loader, d1=0, d2=1, plt=None):
    """A scatter plot of latent factors on some 2-d subspace, with points colored according to test labels."""
    model.eval()
    if plt is None:
        _, plt = import_matplotlib(agg=True, use_style=False)
    tab = ['tab:blue', 'tab:orange', 'tab:green', 'tab:red', 'tab:purple',
           'tab:brown', 'tab:pink', 'tab:gray', 'tab:olive', 'tab:cyan']
    z = []
    labels = []
    for batch_data, batch_labels in data_loader:
        z_batch = model(inputs=[batch_data])['z']
        z.append(utils.to_numpy(z_batch))
        labels.append(utils.to_numpy(batch_labels))
    z = np.concatenate(z, axis=0)
    labels = np.concatenate(labels, axis=0)
    fig, ax = plt.subplots(1)
    legend = []

    # if labels are not vectors, take the first coordiante
    if len(labels.shape) > 1:
        assert len(labels.shape) == 2
        labels = labels[:, 0]

    # replace labels with integers
    possible_labels = list(np.unique(labels))
    labels = [possible_labels.index(label) for label in labels]

    # select up to 10000 points
    cnt = min(10000, len(labels))
    indices = np.random.choice(len(labels), cnt)
    z = z[indices]
    labels = [labels[idx] for idx in indices]

    for i in np.unique(labels):
        indices = (labels == i)
        ax.scatter(z[indices, d1], z[indices, d2], marker='.', color=tab[i], alpha=0.5, edgecolor='', label=i)
        legend.append(str(i))
    fig.legend(legend)
    ax.set_xlabel("$Z_{}$".format(d1))
    ax.set_ylabel("$Z_{}$".format(d2))
    L = np.percentile(z, q=5, axis=0)
    R = np.percentile(z, q=95, axis=0)
    ax.set_xlim(L[d1], R[d1])
    ax.set_ylim(L[d2], R[d2])
    ax.set_title('Latent space')
    return fig, ax


def latent_space_tsne(model, data_loader, plt=None):
    """A scatter plot of latent factors on some 2-d subspace, with points colored according to test labels."""
    model.eval()
    if plt is None:
        _, plt = import_matplotlib(agg=True, use_style=False)
    tab = ['tab:blue', 'tab:orange', 'tab:green', 'tab:red', 'tab:purple',
           'tab:brown', 'tab:pink', 'tab:gray', 'tab:olive', 'tab:cyan']
    z = []
    labels = []
    for batch_data, batch_labels in data_loader:
        z_batch = model(inputs=[batch_data])['z']
        z.append(utils.to_numpy(z_batch))
        labels.append(utils.to_numpy(batch_labels))
    z = np.concatenate(z, axis=0)
    labels = np.concatenate(labels, axis=0)
    fig, ax = plt.subplots(1)
    legend = []

    # if labels are not vectors, take the first coordinate
    if len(labels.shape) > 1:
        assert len(labels.shape) == 2
        labels = labels[:, 0]

    # replace labels with integers
    possible_labels = list(np.unique(labels))
    labels = [possible_labels.index(label) for label in labels]

    # run TSNE for embedding z into 2 dimensional space
    z = TSNE(n_components=2).fit_transform(z)

    # select up to 10000 points
    cnt = min(10000, len(labels))
    indices = np.random.choice(len(labels), cnt)
    z = z[indices]
    labels = [labels[idx] for idx in indices]

    for i in np.unique(labels):
        indices = (labels == i)
        ax.scatter(z[indices, 0], z[indices, 1], marker='.', color=tab[i], alpha=0.5, edgecolor='', label=i)
        legend.append(str(i))
    fig.legend(legend)
    L = np.percentile(z, q=5, axis=0)
    R = np.percentile(z, q=95, axis=0)
    ax.set_xlim(L[0], R[0])
    ax.set_ylim(L[1], R[1])
    ax.set_title('Latent space TSNE plot')
    return fig, ax


def plot_predictions(model, data_loader, key, plt=None, n_examples=10):
    if plt is None:
        _, plt = import_matplotlib(agg=True, use_style=False)
    model.eval()

    pred = utils.apply_on_dataset(model=model, dataset=data_loader.dataset,
                                  output_keys_regexp=key,
                                  max_num_examples=n_examples,
                                  description='plot_predictions:{}'.format(key))[key]
    probs = torch.softmax(pred, dim=1)
    probs = utils.to_numpy(probs)

    data = [get_first_input(data_loader.dataset, i) for i in range(n_examples)]
    labels = [data_loader.dataset[i][1] for i in range(n_examples)]
    samples = torch.stack(data, dim=0)
    samples = revert_normalization(samples, data_loader.dataset)
    samples = utils.to_numpy(samples)

    fig, ax = plt.subplots(nrows=n_examples, ncols=2, figsize=(2*2, 2*n_examples))
    for i in range(n_examples):
        ax[i][0].imshow(get_image(samples[i]), vmin=0, vmax=1)
        ax[i][0].set_axis_off()
        ax[i][0].set_title('labels as {}'.format(labels[i]))

        ax[i][1].bar(range(model.num_classes), probs[i])
        ax[i][1].set_xticks(range(model.num_classes))

    return fig, ax


def plot_images(images, n_rows=None, n_cols=None, titles=None, one_image_size=None, savename=None, plt=None):
    """
    :param images: list of images of from (W, H, 3). Values should be in [0, 1]. Use get_image function
                           above to convert to this format.
    """
    if plt is None:
        _, plt = import_matplotlib(agg=True, use_style=False)
    n_images = len(images)

    # decide number of rows and columns
    if (n_rows is None) and (n_cols is None):
        i = 1
        while i * i <= n_images:
            if n_images % i == 0:
                n_rows = i
            i += 1
        n_cols = n_images // n_rows
    elif n_cols is None:
        n_cols = 1
        while n_rows * n_cols < n_images:
            n_cols += 1
    elif n_rows is None:
        n_rows = 1
        while n_rows * n_cols < n_images:
            n_rows += 1

    # determine one image size
    if one_image_size is None:
        one_image_size = (2, 2)
    if isinstance(one_image_size, int):
        one_image_size = (one_image_size, one_image_size)

    fig, ax = plt.subplots(nrows=n_rows, ncols=n_cols, squeeze=False,
                           figsize=(n_cols * one_image_size[0], n_rows * one_image_size[1]))
    for i in range(n_images):
        row_idx = i // n_cols
        col_idx = i % n_cols
        cax = ax[row_idx][col_idx]
        cax.imshow(images[i], vmin=0, vmax=1)
        cax.set_axis_off()
        if titles is not None:
            cax.set_title(titles[i])

    fig.tight_layout()

    if savename is not None:
        savefig(fig, savename)

    return fig, ax


def plot_examples_from_dataset(data, indices, n_rows=None, n_cols=None, one_image_size=None, savename=None, plt=None,
                               is_label_one_hot=False, skip_titles=False, label_names=None, **kwargs):
    n = len(indices)
    images = []
    titles = []
    for i in range(n):
        x = get_first_input(data, indices[i])
        y = data[indices[i]][1]
        if is_label_one_hot:
            y = torch.argmax(y)
        if isinstance(y, torch.Tensor) and y.ndim == 0:
            y = y.item()
        x = revert_normalization(x, data)[0]
        x = utils.to_numpy(x)
        images.append(get_image(x))
        if label_names is None:
            titles.append(f'class {y}')
        else:
            titles.append(label_names[y])
    if skip_titles:
        titles = None
    return plot_images(images=images, n_rows=n_rows, n_cols=n_cols, titles=titles,
                       one_image_size=one_image_size, savename=savename, plt=plt)
