# Supplementary material
Source: ML conference proceedings conference paper supplement (https://proceedings.neurips.cc/paper_files/paper/2022/hash/41b6674c28a9b93ec8d22a53ca25bc3b-Abstract.html)
Supplement: Supplementary file 1 [file 41b6674c28a9b93ec8d22a53ca25bc3b-Supplemental-Conference.zip › a_new_family_of_generalization_bounds_supp/klbound/f-CMI/nnlib/README.md]

# Useful and frequently used code for training neural networks


## Requirements:
* Basic data science libraries: `numpy`, `scipy`, `tqdm`, `matplotlib`, `seaborn`, `pandas`, `scikit-learn`.
* We use `Pytorch 1.4.0`, but higher versions may work too.
* Additionally, only for extracting data from Tensorboard files one might need `tensorflow >= 2.0`.
