# Supplementary material
Source: ML conference proceedings conference paper supplement (https://proceedings.neurips.cc/paper_files/paper/2022/hash/41b6674c28a9b93ec8d22a53ca25bc3b-Abstract.html)
Supplement: Supplementary file 1 [file 41b6674c28a9b93ec8d22a53ca25bc3b-Supplemental-Conference.zip › a_new_family_of_generalization_bounds_supp/klbound/f-CMI/README-harutyunyan-etal.md]

# Replicating the experiments
1. Generate the commands for the desired experiment using the `scripts/fcmi_scripts.py` script.
2. Parse the result of the experiment using the `scripts/fcmi_parse_results.py` script.
3. Use the `notebooks/fcmi-plots.ipynb` to generate plots from the parsed results.

# Requirements
* Basic libraries such as `numpy`, `scipy`, `tqdm`, `matplotlib`, and `seaborn`.
* We used `Pytorch 1.7.0`, but higher versions should work too.
