# Supplementary material
Source: ML conference proceedings conference paper supplement (https://proceedings.neurips.cc/paper_files/paper/2022/hash/41b6674c28a9b93ec8d22a53ca25bc3b-Abstract.html)
Supplement: Supplementary file 1 [file 41b6674c28a9b93ec8d22a53ca25bc3b-Supplemental-Conference.zip › a_new_family_of_generalization_bounds_supp/klbound/new_family_evaluated_cmi_test.ipynb]

# %% [markdown]
# How to replicate the experiments

1. Download the repository f-CMI from https://github.com/hrayrhar/f-CMI
2. Replace the files: *scripts/fcmi_scripts.py*, *scripts/fcmi_parse_results.py*, and *modules/bound_utils.py* with the corresponding files from the supplementary material. If errors occur in the next steps, it may also be necessary to replace *nnlib/nnlib/data_utils/abstract.py* with the corresponding file from the supplementary material. Also, it may be necessary to move the files *fcmi_scripts.py* and *fcmi_parse_results.py* out of the folder *scripts*, so that they are directly in the *f-CMI* folder.
3. Run the code in the notebook. Note that the commands generated in the second code cell must be executed.

# %% [code]
from google.colab import drive
drive.mount('/content/drive')
%cd drive/MyDrive/klbound/f-CMI

# Go to correct folder, adjust as necessary
#%cd f-CMI

# %% [code]
# Generate commands for running all experiments. When the generated commands
# are executed, experimental data is created
!python fcmi_scripts.py -E fcmi-mnist-4vs9-CNN
!python fcmi_scripts.py -E fcmi-mnist-4vs9-CNN-LD
!python fcmi_scripts.py -E cifar10-pretrained-resnet50
!python fcmi_scripts.py -E fcmi-mnist-4vs9-CNN-halfnoisy
!python fcmi_scripts.py -E fcmi-mnist-4vs9-CNN-noisy
!python fcmi_scripts.py -E cifar10-pretrained-resnet50-LD
!python fcmi_scripts.py -E fcmi-mnist-4vs9-CNN-lr
!python fcmi_scripts.py -E fcmi-mnist-4vs9-CNN-width
!python fcmi_scripts.py -E fcmi-mnist-4vs9-CNN-depth

# %% [code]
# Parse the results of all experiments
!python fcmi_parse_results.py --exp_name fcmi-mnist-4vs9-CNN
!python fcmi_parse_results.py --exp_name fcmi-mnist-4vs9-CNN-LD
!python fcmi_parse_results.py --exp_name cifar10-pretrained-resnet50
!python fcmi_parse_results.py --exp_name fcmi-mnist-4vs9-CNN-halfnoisy
!python fcmi_parse_results.py --exp_name fcmi-mnist-4vs9-CNN-noisy
!python fcmi_parse_results.py --exp_name cifar10-pretrained-resnet50-LD
!python fcmi_parse_results.py --exp_name fcmi-mnist-4vs9-CNN-lr
!python fcmi_parse_results.py --exp_name fcmi-mnist-4vs9-CNN-width
!python fcmi_parse_results.py --exp_name fcmi-mnist-4vs9-CNN-depth

# %% [code]
# Imports and utilities for plotting
%load_ext autoreload
%autoreload 2
import os

# %% [code]
from tqdm import tqdm
import os
import argparse
import torch
import pickle
import numpy as np
from nnlib.nnlib import utils
from nnlib.nnlib.visualizations import savefig
from modules.bound_utils import estimate_fcmi_bound_classification
import methods

%matplotlib notebook
import matplotlib
from matplotlib import pyplot as plt
from nnlib.nnlib.matplotlib_utils import set_default_configs
import seaborn
set_default_configs(plt, seaborn)

# %% [code]
class NestedDict(dict):
    def __missing__(self, key):
        self[key] = type(self)()
        return self[key]

# %% [code]
def plot_curve(ax, xs, means, stds, marker=None, label=None):
    means = np.array(means)
    stds = np.array(stds)
    ax.plot(xs, means, label=label, marker=marker)
    plt.fill_between(xs, means-stds, means+stds, alpha=0.2)
    return ax

# %% [code]
def plot_over_n_new(results, ns, epoch):
    fig, ax = plt.subplots(figsize=(6, 4))

    fcmi_means = []
    fcmi_stds = []
    kl_means = []
    kl_stds = []
    interp_means = []
    interp_stds = []
    val_means = []
    val_stds = []
    train_means = []
    train_stds = []

    for n in ns:
        fcmi_mean = np.nanmean([d['fcmi_bound'] for d in results[n][epoch]])
        fcmi_std = np.nanstd([d['fcmi_bound'] for d in results[n][epoch]])
        if np.isnan(fcmi_std):
            fcmi_std = 0.0
        fcmi_means.append(fcmi_mean)
        fcmi_stds.append(fcmi_std)

        kl_mean = np.nanmean([d['kl_bound'] for d in results[n][epoch]])
        kl_std = np.nanstd([d['kl_bound'] for d in results[n][epoch]])
        if np.isnan(kl_std):
            kl_std = 0.0
        kl_means.append(kl_mean)
        kl_stds.append(kl_std)

        if 'interp_bound' in results[n][epoch][0]:
            interp_mean = np.nanmean([d['interp_bound'] for d in results[n][epoch]])
            interp_std = np.nanstd([d['interp_bound'] for d in results[n][epoch]])
            if np.isnan(interp_std):
                interp_std = 0.0
            if interp_mean <= kl_mean:
                interp_means.append(interp_mean)
                interp_stds.append(interp_std)

        val_mean = 1-np.nanmean([d['exp_val_acc'] for d in results[n][epoch]])
        val_std = np.nanstd([d['exp_val_acc'] for d in results[n][epoch]])
        if np.isnan(val_std):
            val_std = 0.0
        val_means.append(val_mean)
        val_stds.append(val_std)

        train_mean = 1-np.nanmean([d['exp_train_acc'] for d in results[n][epoch]])
        train_std = np.nanstd([d['exp_train_acc'] for d in results[n][epoch]])
        if np.isnan(train_std):
            train_std = 0.0
        train_means.append(train_mean)
        train_stds.append(train_std)


    plot_curve(ax, range(len(ns)), val_means, val_stds, label=f'Test error', marker='o')
    plot_curve(ax, range(len(ns)), np.add(train_means,fcmi_means), np.add(fcmi_stds,train_stds), label=f'Square root', marker='x')#9
    plot_curve(ax, range(len(ns)), kl_means, kl_stds, label=f'Binary KL', marker='x')#25
    #if len(interp_means) > 1:
    #    plot_curve(ax, range(len(interp_means)), interp_means, interp_stds, label=f'Interpolation', marker='x')#17
    ax.set_xlabel('n')
    ax.set_ylabel('Error')
    ax.set_xticks(range(len(ns)))
    ax.set_xticklabels(ns)
    ax.legend()
    fig.tight_layout()
    
    print(train_means)
    print(val_means)
    print(np.add(fcmi_means,train_means))
    print(kl_means)
    
    return fig, ax

# %% [code]
def plot_over_epochs_new(results, n, epochs):
    fig, ax = plt.subplots(figsize=(6, 4))

    fcmi_means = []
    fcmi_stds = []
    gap_means = []
    gap_stds = []
    kl_means = []
    kl_stds = []
    train_means = []
    train_stds = []
    test_means = []
    test_stds = []
    for epoch in epochs:
        fcmi_mean = np.nanmean([d['fcmi_bound'] for d in results[n][epoch]])
        fcmi_std = np.nanstd([d['fcmi_bound'] for d in results[n][epoch]])
        if np.isnan(fcmi_std):
            fcmi_std = 0.0
        gap_mean = np.nanmean([d['exp_gap'] for d in results[n][epoch]])
        gap_std = np.nanstd([d['exp_gap'] for d in results[n][epoch]])
        if np.isnan(gap_std):
            gap_std = 0.0
        kl_mean = np.nanmean([d['kl_bound'] for d in fcmi_results[n][epoch]])
        kl_std = np.nanstd([d['kl_bound'] for d in fcmi_results[n][epoch]])
        if np.isnan(kl_std):
                kl_std = 0.0
        train_mean = 1-np.nanmean([d['exp_train_acc'] for d in fcmi_results[n][epoch]])
        train_std = np.nanstd([d['exp_train_acc'] for d in fcmi_results[n][epoch]])
        test_mean = 1.0 - np.nanmean([d['exp_val_acc'] for d in fcmi_results[n][epoch]])
        test_std = np.nanstd([d['exp_val_acc'] for d in fcmi_results[n][epoch]])
        test_means.append(test_mean)
        test_stds.append(test_std)
        kl_means.append(kl_mean)
        kl_stds.append(kl_std)
        train_means.append(kl_mean)
        train_stds.append(kl_std)

        fcmi_means.append(fcmi_mean)
        fcmi_stds.append(fcmi_std)
        gap_means.append(gap_mean)
        gap_stds.append(gap_std)
    
    plot_curve(ax, epochs, test_means, test_stds, label=f'Test error', marker='o')
    plot_curve(ax, epochs, np.add(fcmi_means,train_means), np.add(fcmi_stds,train_stds), label=f'Square root', marker='x')#9
    plot_curve(ax, epochs, kl_means, kl_stds, label=f'Binary KL', marker='x')#25
    ax.set_xlabel('Epochs')
    ax.set_ylabel('Error')
    ax.legend()
    fig.tight_layout()
    return fig, ax

# %% [code]
def plot_over_arb(results, ns, epoch, xlabel, xticks):
    fig, ax = plt.subplots(figsize=(6, 4))

    fcmi_means = []
    fcmi_stds = []
    kl_means = []
    kl_stds = []
    interp_means = []
    interp_stds = []
    val_means = []
    val_stds = []
    train_means = []
    train_stds = []

    for n in ns:
        fcmi_mean = np.nanmean([d['fcmi_bound'] for d in results[n][epoch]])
        fcmi_std = np.nanstd([d['fcmi_bound'] for d in results[n][epoch]])
        if np.isnan(fcmi_std):
            fcmi_std = 0.0
        fcmi_means.append(fcmi_mean)
        fcmi_stds.append(fcmi_std)

        kl_mean = np.nanmean([d['kl_bound'] for d in results[n][epoch]])
        kl_std = np.nanstd([d['kl_bound'] for d in results[n][epoch]])
        if np.isnan(kl_std):
            kl_std = 0.0
        kl_means.append(kl_mean)
        kl_stds.append(kl_std)

        if 'interp_bound' in results[n][epoch][0]:
            interp_mean = np.nanmean([d['interp_bound'] for d in results[n][epoch]])
            interp_std = np.nanstd([d['interp_bound'] for d in results[n][epoch]])
            if np.isnan(interp_std):
                interp_std = 0.0
            if interp_mean <= kl_mean:
                interp_means.append(interp_mean)
                interp_stds.append(interp_std)

        val_mean = 1-np.nanmean([d['exp_val_acc'] for d in results[n][epoch]])
        val_std = np.nanstd([d['exp_val_acc'] for d in results[n][epoch]])
        if np.isnan(val_std):
            val_std = 0.0
        val_means.append(val_mean)
        val_stds.append(val_std)

        train_mean = 1-np.nanmean([d['exp_train_acc'] for d in results[n][epoch]])
        train_std = np.nanstd([d['exp_train_acc'] for d in results[n][epoch]])
        if np.isnan(train_std):
            train_std = 0.0
        train_means.append(train_mean)
        train_stds.append(train_std)


    plot_curve(ax, range(len(ns)), val_means, val_stds, label=f'Test error', marker='o')
    plot_curve(ax, range(len(ns)), np.add(train_means,fcmi_means), np.add(fcmi_stds,train_stds), label=f'Square root', marker='x')#9
    plot_curve(ax, range(len(ns)), kl_means, kl_stds, label=f'Binary KL', marker='x')#25
    #if len(interp_means) > 1:
    #    plot_curve(ax, range(len(interp_means)), interp_means, interp_stds, label=f'Interpolation', marker='x')#17
    ax.set_xlabel(xlabel)
    ax.set_ylabel('Error')
    ax.set_xticks(range(len(ns)))
    ax.set_xticklabels(xticks)
    ax.legend()
    fig.tight_layout()
    
    print(train_means)
    print(val_means)
    print(np.add(fcmi_means,train_means))
    print(kl_means)
    
    return fig, ax

# %% [code]
## Plot Figure 1(a)

B = np.linspace(0,np.log(2),200);
myi = np.sqrt(2*B);
sy = B/0.37;
syint = B/np.log(2);
wy = 2*(1-np.exp(-B));

fig, ax = plt.subplots(figsize=(6, 4))

plot_curve(ax, B, myi, np.zeros_like(B), label=f'Square root') #10
plot_curve(ax, B, sy, np.zeros_like(B), label=f'Linear') #16
plot_curve(ax, B, syint, np.zeros_like(B), label=f'Interpolation') #17
plot_curve(ax, B, wy, np.zeros_like(B), label=f'Binary KL') #23
plt.axvline(x=0.275,color='k', linestyle='--', linewidth=0.8,alpha = 0.5)

ax.set_xlabel(r'$B$')
ax.set_ylabel(r'Bound on $L_{\mathcal{D}}$')
ax.set_ylim([0,1])
ax.set_xticks([0,0.27,np.log(2)])
ax.set_xticklabels(['0','0.27','log(2)'])
ax.legend()
fig.tight_layout()

savefig(fig, os.path.join('figs', f'fourboundplot.pdf'))

# %% [code]
## Plot Figure 1(b)

import numpy as np
import matplotlib.pyplot as plt
import scipy.optimize as opt

def kl(q,p):
    if q>0:
        return q*np.log(q/p) + (1-q)*np.log( (1-q)/(1-p) )
    else:
        return np.log( 1/(1-p) )

def klbound(B, train_acc):
    Rhat = 1-train_acc
    # Constraints are expressions that should be non-negative
    # Below factors guarantee R<=1, R>=0,and bound satisfied
    def con(R):
        return (B*np.log(2)-kl(Rhat,Rhat/2 + R/2))*R*(1-R)
    # Minimize -R to find biggest R that satisfies constraints
    objective = lambda R: -R
    cons = ({'type': 'ineq', 'fun' : con})
    results = opt.minimize(objective,x0=0.5,constraints = cons,options = {'disp':False})
    bound = results.x[0]
    return min(bound,1)

def lgbound(B, train_acc):
    Rhat = 1-train_acc
    def con(x):
        return (-x[0]*(1-x[1]) - (np.exp(x[0]) - 1 - x[0] ) * ( 1 + x[1]**2 ))
    objective = lambda x: x[1]*Rhat + B*np.log(2)/x[0]
    cons = ({'type': 'ineq', 'fun' : con})
    bnds = ((0, 0.37),(1,np.inf))
    results = opt.minimize(objective,x0=[3,2],constraints = cons,bounds = bnds,options = {'disp':False})
    bound = results.x[1]*Rhat + B*np.log(2)/results.x[0]
    return min(bound,1)

def maxbound_int(B, train_acc):
    Rhat = 1-train_acc
    bound = Rhat + np.sqrt(B*2*np.log(2))
    return min(bound,1)

NN = 2000
acc_vec = np.linspace(0.0,1.0,NN)
B_vec = np.linspace(0.0,1.0,NN)
data = np.zeros((NN, NN))

for Ri in range(NN):
    acc = acc_vec[Ri]
    for Bi in range(NN):
        B = B_vec[Bi]
        Mi = maxbound_int(B,acc)
        Si = lgbound(B,acc)
        kli = klbound(B,acc)
        index_min = np.argmin(np.array([kli,Si,Mi]))
        if kli >= 1 and Si >= 1 and Mi >= 1:
            index_min = 3
        data[Ri,Bi] = index_min

fig, ax = plt.subplots(figsize=(8, 5))

colorsList = ['w','b','g','r']
CustomCmap = matplotlib.colors.ListedColormap(colorsList)

data[:,-1] = 3*np.ones((1,NN))
data[-1,:] = 3*np.ones((1,NN))

data[-1,1] = 3.5
data[0,0] = -0.5

im = ax.imshow(np.flipud(data), cmap=CustomCmap, alpha = 0.3)

ax.set_xlabel(r'$B$')
ax.set_ylabel(r'$\widehat{L}$')
ax.set_ylim([0,1])
ax.set_xticks(np.linspace(0,NN+1,3))
ax.set_xticklabels([r'$0$',r'$\log(2)/2$',r'$\log(2)$'])
ax.set_yticks(np.flip(np.arange(0,NN+1,NN/4)))
ax.set_yticklabels(np.linspace(1,0,5))

cbar = plt.colorbar(im, ticks = [0,1,2,3])
cbar.set_clim(-0.5,4)
cbar.ax.set_yticklabels([r'Binary KL', r'Linear', r'Square root','Trivial'])
#cbar.ax.set_yticklabels([r'(23)', r'(16)', r'(10)','Trivial'])

savefig(fig, os.path.join('figs', f'pixel-plot.pdf'))

# %% [code]
# Plot functions for making one line thicker for presentation slides

def plot_curve_thick(ax, xs, means, stds, marker=None, label=None):
    means = np.array(means)
    stds = np.array(stds)
    ax.plot(xs, means, label=label, marker=marker, linewidth = 2.8)
    plt.fill_between(xs, means-stds, means+stds, alpha=0.5)
    return ax

def plot_over_n_new_thick(results, ns, epoch, thick):
    fig, ax = plt.subplots(figsize=(6, 4))

    fcmi_means = []
    fcmi_stds = []
    kl_means = []
    kl_stds = []
    interp_means = []
    interp_stds = []
    val_means = []
    val_stds = []
    train_means = []
    train_stds = []

    for n in ns:
        fcmi_mean = np.nanmean([d['fcmi_bound'] for d in results[n][epoch]])
        fcmi_std = np.nanstd([d['fcmi_bound'] for d in results[n][epoch]])
        if np.isnan(fcmi_std):
            fcmi_std = 0.0
        fcmi_means.append(fcmi_mean)
        fcmi_stds.append(fcmi_std)

        kl_mean = np.nanmean([d['kl_bound'] for d in results[n][epoch]])
        kl_std = np.nanstd([d['kl_bound'] for d in results[n][epoch]])
        if np.isnan(kl_std):
            kl_std = 0.0
        kl_means.append(kl_mean)
        kl_stds.append(kl_std)

        if 'interp_bound' in results[n][epoch][0]:
            interp_mean = np.nanmean([d['interp_bound'] for d in results[n][epoch]])
            interp_std = np.nanstd([d['interp_bound'] for d in results[n][epoch]])
            if np.isnan(interp_std):
                interp_std = 0.0
            if interp_mean <= kl_mean:
                interp_means.append(interp_mean)
                interp_stds.append(interp_std)

        val_mean = 1-np.nanmean([d['exp_val_acc'] for d in results[n][epoch]])
        val_std = np.nanstd([d['exp_val_acc'] for d in results[n][epoch]])
        if np.isnan(val_std):
            val_std = 0.0
        val_means.append(val_mean)
        val_stds.append(val_std)

        train_mean = 1-np.nanmean([d['exp_train_acc'] for d in results[n][epoch]])
        train_std = np.nanstd([d['exp_train_acc'] for d in results[n][epoch]])
        if np.isnan(train_std):
            train_std = 0.0
        train_means.append(train_mean)
        train_stds.append(train_std)

    if thick == 'test':
        plot_curve_thick(ax, range(len(ns)), val_means, val_stds, label=f'Test error', marker='o')
    else:
        plot_curve(ax, range(len(ns)), val_means, val_stds, label=f'Test error', marker='o')
    if thick == 'square':
        plot_curve_thick(ax, range(len(ns)), np.add(train_means,fcmi_means), np.add(fcmi_stds,train_stds), label=f'Square root', marker='x')#9
    else:
        plot_curve(ax, range(len(ns)), np.add(train_means,fcmi_means), np.add(fcmi_stds,train_stds), label=f'Square root', marker='x')#9
    if thick == 'KL':
        plot_curve_thick(ax, range(len(ns)), kl_means, kl_stds, label=f'Binary KL', marker='x')#25
    else:
        plot_curve(ax, range(len(ns)), kl_means, kl_stds, label=f'Binary KL', marker='x')#25
    if len(interp_means) > 1:
        if thick == 'interp':
            plot_curve_thick(ax, range(len(interp_means)), interp_means, interp_stds, label=f'Interpolation', marker='x')#17
        else:
            plot_curve(ax, range(len(interp_means)), interp_means, interp_stds, label=f'Interpolation', marker='x')#17
    ax.set_xlabel('n')
    ax.set_ylabel('Error')
    ax.set_xticks(range(len(ns)))
    ax.set_xticklabels(ns)
    ax.legend()
    fig.tight_layout()
    
    print(train_means)
    print(val_means)
    print(np.add(fcmi_means,train_means))
    print(kl_means)
    
    return fig, ax

# %% [code]
## Plot Figure 2(a) versions for presentation slides
results_dir = "results"
n_seeds = 5
n_S_seeds = 30
ns = [75, 250, 1000, 4000]
epochs = [200]
num_classes = 2

exp_name = "fcmi-mnist-4vs9-CNN-wo-noise"
results_file_path = os.path.join(results_dir, exp_name, 'results.pkl')
with open(results_file_path, 'rb') as f:
    deterministic_results = pickle.load(f)

fig, ax = plot_over_n_new_thick(deterministic_results, ns=ns, epoch=epochs[-1], thick = 'test')
savefig(fig, os.path.join('figs', f'mnist-sgd-testthick.pdf'))

# %% [code]
## Plot Figure 2(a)
results_dir = "results"
n_seeds = 5
n_S_seeds = 30
ns = [75, 250, 1000, 4000]
epochs = [200]
num_classes = 2

exp_name = "fcmi-mnist-4vs9-CNN"
results_file_path = os.path.join(results_dir, exp_name, 'results.pkl')
with open(results_file_path, 'rb') as f:
    deterministic_results = pickle.load(f)

fig, ax = plot_over_n_new(deterministic_results, ns=ns, epoch=epochs[-1])
savefig(fig, os.path.join('figs', f'mnist-sgd.pdf'))

# %% [code]
## Plot Figure 2(b)
results_dir = "results"
exp_name = "cifar10-pretrained-resnet50"
n_seeds = 2
n_S_seeds = 20
ns = [1000, 5000, 20000]
epochs = [40]
num_classes = 10
batch_size = 64

results_file_path = os.path.join(results_dir, f'{exp_name}', 'results.pkl')
with open(results_file_path, 'rb') as f:
    fcmi_results = pickle.load(f)

fig, ax = plot_over_n_new(fcmi_results, ns=ns, epoch=epochs[-1])
ax.set_yticks(np.linspace(0.05, 0.35, 4))
ax.set_ylim(bottom=0.0)
savefig(fig, os.path.join('figs', f'cifar-sgd.pdf'))

# %% [code]
## Plot Figure 2(c)
results_dir = "results"
exp_name = "fcmi-mnist-4vs9-CNN-LD"
n_seeds = 5
n_S_seeds = 30
n = 4000
ns = [4000]
epochs = np.arange(1, 11) * 4
num_classes = 2
batch_size = 100

results_file_path = os.path.join(results_dir, f'{exp_name}', 'results.pkl')
with open(results_file_path, 'rb') as f:
    fcmi_results = pickle.load(f)
    
results_file_path = os.path.join(results_dir, f'{exp_name}', 'sgld_results.pkl')
with open(results_file_path, 'rb') as f:
    sgld_results = pickle.load(f)

fig, ax = plot_over_epochs_new(fcmi_results, n=ns[0], epochs=epochs)

sgld_means = []
sgld_stds = []
train_means = []
train_stds = []

for epoch in epochs:
    sgld_mean = np.nanmean([d['sgld_bound'] for d in sgld_results[n][epoch]])
    sgld_std = np.nanstd([d['sgld_bound'] for d in sgld_results[n][epoch]])
    if np.isnan(sgld_std):
            sgld_std = 0.0
    train_mean = 1-np.nanmean([d['exp_train_acc'] for d in fcmi_results[n][epoch]])
    train_std = np.nanstd([d['exp_train_acc'] for d in fcmi_results[n][epoch]])
    sgld_means.append(sgld_mean)
    sgld_stds.append(sgld_std)
    train_means.append(train_mean)
    train_stds.append(train_std)
    
plot_curve(ax, epochs, np.add(train_means,sgld_means), np.add(train_stds,sgld_stds), label=f'SGLD [11, Eq. (6)]', marker='*')

ax.legend()
ax.set_yticks(np.linspace(0.0, 0.5, 6))
fig.tight_layout()
fig.show()
savefig(fig, os.path.join('figs', f'mnist-sgld.pdf'))

# %% [code]
# Plot Figure 3(a)

# This is the same as Figure 2(a)

# %% [code]
# Plot Figure 3(b)

results_dir = "results"
n_seeds = 5
n_S_seeds = 30
ns = [75, 250, 1000, 4000]
epochs = [200]
num_classes = 2

exp_name = "fcmi-mnist-4vs9-CNN-halfnoisy"
results_file_path = os.path.join(results_dir, exp_name, 'results.pkl')
with open(results_file_path, 'rb') as f:
    deterministic_results = pickle.load(f)

fig, ax = plot_over_n_new(deterministic_results, ns=ns, epoch=epochs[-1])
ax.set_ylim([0, 1])
savefig(fig, os.path.join('figs', f'mnist-sgd-halfnoisy.pdf'))

# %% [code]
# Plot Figure 3(c)

exp_name = "fcmi-mnist-4vs9-CNN-noisy"
results_file_path = os.path.join(results_dir, exp_name, 'results.pkl')
with open(results_file_path, 'rb') as f:
    deterministic_results = pickle.load(f)

fig, ax = plot_over_n_new(deterministic_results, ns=ns, epoch=epochs[-1])
ax.set_ylim([0, 1])
savefig(fig, os.path.join('figs', f'mnist-sgd-noisy.pdf'))

# %% [code]
sgld_results

# %% [code]
# Plot Figure 4(a)

results_dir = "results"
exp_name = "cifar10-pretrained-resnet50-LD"
n_seeds = 2 
n_S_seeds = 40  
ns = [20000]
epochs = np.arange(1, 9) * 2
num_classes = 10
batch_size = 64
n = ns[0]  # 20000


results_file_path = os.path.join(results_dir, f'{exp_name}', 'results.pkl')
with open(results_file_path, 'rb') as f:
    fcmi_results = pickle.load(f)
    
print(fcmi_results)

results_file_path = os.path.join(results_dir, f'{exp_name}', 'sgld_results.pkl')
with open(results_file_path, 'rb') as f:
    sgld_results = pickle.load(f)

fig, ax = plot_over_epochs_new(fcmi_results, n=ns[0], epochs=epochs)

# Data from Harutyunyan et al (2021)
sgld_means = [0.4562828011406939,
 0.6526754635440749,
 1.1598920611525294,
 2.101055669357393,
 2.624184934276673,
 2.8768795381293772,
 3.022861941304835,
 3.122461987848108]
sgld_stds = [0]*len(sgld_means)


plot_curve(ax, epochs, np.add(train_means,sgld_means), np.add(train_stds,sgld_stds), label=f'SGLD [11, Eq. (6)]', marker='x')#

ax.legend()
#ax.set_yticks(np.linspace(0.0, 0.75, 6))
#ax.set_ylim([0,0.75])
fig.tight_layout()
fig.show()
savefig(fig, os.path.join('figs', f'cifar-sgld.pdf'))

# %% [code]
# Plot Figure 4(b)


results_file_path = os.path.join(results_dir, f'{exp_name}', 'results.pkl')
with open(results_file_path, 'rb') as f:
    fcmi_results = pickle.load(f)

results_file_path = os.path.join(results_dir, f'{exp_name}', 'sgld_results.pkl')
with open(results_file_path, 'rb') as f:
    sgld_results = pickle.load(f)

fig, ax = plot_over_epochs_new(fcmi_results, n=ns[0], epochs=epochs)

ax.legend()
fig.tight_layout()
fig.show()
savefig(fig, os.path.join('figs', f'cifar-sgld-zoom.pdf'))

# %% [code]
# # # # # Plot Figure 5(a)
results_dir = "results"
n_seeds = 5
n_S_seeds = 30
ns = [0.1, 1e-3, 1e-5]
epochs = [200]
num_classes = 2

exp_name = "fcmi-mnist-4vs9-CNN-lr"
results_file_path = os.path.join(results_dir, exp_name, 'results.pkl')
with open(results_file_path, 'rb') as f:
    deterministic_results = pickle.load(f)

fig, ax = plot_over_arb(deterministic_results, ns=ns, epoch=epochs[-1], 
                        xlabel = 'Learning rate', xticks = ['$10^{-1}$', '$10^{-3}$','$10^{-5}$'])
savefig(fig, os.path.join('figs', f'mnist-sgd-lr-new.pdf'))

# %% [code]
# # # # # Plot Figure 5(b)
results_dir = "results"
n_seeds = 5
n_S_seeds = 30
ns = [0, 1, 2]
epochs = [200]
num_classes = 2

exp_name = "fcmi-mnist-4vs9-CNN-width"
results_file_path = os.path.join(results_dir, exp_name, 'results.pkl')
with open(results_file_path, 'rb') as f:
    deterministic_results = pickle.load(f)

fig, ax = plot_over_arb(deterministic_results, ns=ns, epoch=epochs[-1], 
                        xlabel = 'Width (normalized)', xticks = ['1', '2','4'])
savefig(fig, os.path.join('figs', f'mnist-sgd-width-new.pdf'))

# %% [code]
# # # # # Plot Figure 5(c)
results_dir = "results"
n_seeds = 5
n_S_seeds = 30
ns = [0, 1, 2]
epochs = [200]
num_classes = 2

exp_name = "fcmi-mnist-4vs9-CNN-depth"
results_file_path = os.path.join(results_dir, exp_name, 'results.pkl')
with open(results_file_path, 'rb') as f:
    deterministic_results = pickle.load(f)

fig, ax = plot_over_arb(deterministic_results, ns=ns, epoch=epochs[-1], 
                        xlabel = 'Convolutional depth', xticks = ['2', '4','6'])
savefig(fig, os.path.join('figs', f'mnist-sgd-depth-new.pdf'))
