# Supplementary material
Source: ML conference proceedings conference paper supplement (https://proceedings.neurips.cc/paper_files/paper/2022/hash/41b6674c28a9b93ec8d22a53ca25bc3b-Abstract.html)
Supplement: Supplementary file 1 [file 41b6674c28a9b93ec8d22a53ca25bc3b-Supplemental-Conference.zip › a_new_family_of_generalization_bounds_supp/klbound/README.md]

# How to replicate the experiments

1. Either: *(i)* Use the files provided in this ZIP-file, including files from the GitHub repo *f-CMI* and *nnlib* by *hrayhar*, or,  
*(ii)* Download the repository f-CMI from https://github.com/hrayrhar/f-CMI and replace the files: *scripts/fcmi_scripts.py*, *scripts/fcmi_parse_results.py*, and *modules/bound_utils.py* with the corresponding files from the supplementary material. If errors occur in the next steps, it may also be necessary to replace *nnlib/nnlib/data_utils/abstract.py* with the corresponding file from the supplementary material. It may also be necessary to place the files *fcmi_scripts.py* and *fcmi_parse_results.py* directly in the *f-CMI* folder, rather than inside the folder *scripts*.


2. Run the code in the notebook *a_new_family_of_generalization-Notebook.ipynb*. Note that the commands generated by the first code cell must be executed.
